# Supplementary material for: Influence of a Hyperglycemic Microenvironment on a Diabetic Versus Healthy Rat Vascular Endothelium Reveals Distinguishable Mechanistic and Phenotypic Responses
Source: Front Physiol. 2019 May 10;10:558. doi: 10.3389/fphys.2019.00558 (PMC6524400; doi:10.3389/fphys.2019.00558)
Supplement: Supplementary file 3 [file Table_2.xlsx]

## Sheet: Table S2- WKY (HG vs NG)
Supplemental Table S2. Complete proteomic comparison dataset for the WKY RCMVEC high glucose versus normal glucose treated groups.
		WKY RCMVECs
Accession Number	Description	Normal glucose		High glucose		Log2 Ratio	Normalized p-value
		Total Peptides	Scan count	Total Peptides	Scan count
P85108	Tubulin beta-2A chain	20	319	0	0	NG only	1.07345e-103
Q8VD48	Dehydrogenase/reductase SDR family member 9 precursor	9	47	0	0	NG only	2.2118e-13
O08547	Vesicle trafficking protein SEC22b	6	34	0	0	NG only	5.1256e-09
P20171	GTPase HRas precursor	6	20	0	0	NG only	0.000279966
Q1H5H1	Selenoprotein T precursor	1	20	0	0	NG only	0.000279966
Q6IV68	Fanconi anemia group D2 protein homolog	4	18	0	0	NG only	0.00134795
Q63941	Ras-related protein Rab-3B	4	18	0	0	NG only	0.00134795				Color index
Q9R1J0	Sterol-4-alpha-carboxylate 3-dehydrogenase, decarboxylating	2	18	0	0	NG only	0.00134795
Q9WTR7	Signal peptidase complex catalytic subunit SEC11C	2	18	0	0	NG only	0.00134795				Uniquely expressed and significantly altered (p<0.05) in HG only
Q9ES58	Cell surface glycoprotein OX2 receptor precursor	2	17	0	0	NG only	0.00296358				Uniquely expressed and significantly altered (p<0.05) in NG only
P03899	NADH-ubiquinone oxidoreductase chain 3	1	17	0	0	NG only	0.00296358				Significantly altered (p<0.05)
Q9CZX0	Elongator complex protein 3	2	16	0	0	NG only	0.00652562
Q9CQZ5	NADH dehydrogenase 1 alpha subcomplex subunit 6	2	16	0	0	NG only	0.00652562
P83871	PHD finger-like domain-containing protein 5A	3	15	0	0	NG only	0.0143936
Q9CQ91	NADH dehydrogenase 1 alpha subcomplex subunit 3	1	14	0	0	NG only	0.0318092
P35831	Tyrosine-protein phosphatase non-receptor type 12	4	14	0	0	NG only	0.0318092
Q8BX07	Carboxy-terminal domain RNA polymerase II polypeptide A small phosphatase 2	0	0	1	17	HG only	0.0302726
Q91VC3	Eukaryotic initiation factor 4A-III	0	0	3	17	HG only	0.0302726
Q9JHW4	Selenocysteine-specific elongation factor	0	0	4	17	HG only	0.0302726
Q8R5C8	Zinc finger MYND domain-containing protein 11	0	0	5	17	HG only	0.0302726
Q99JZ7	ERBB receptor feedback inhibitor 1	0	0	1	18	HG only	0.0157094
Q6AY96	Transcription initiation factor IIF subunit alpha	0	0	4	18	HG only	0.0157094
Q00899	Transcriptional repressor protein YY1	0	0	2	18	HG only	0.0157094
P62265	40S ribosomal protein S14	0	0	2	20	HG only	0.00424683
P00676	Ribonuclease pancreatic	0	0	1	21	HG only	0.00221185
Q2PS20	Junctophilin-2	0	0	3	22	HG only	0.00115314
P54313	Guanine nucleotide-binding protein G/G/G subunit beta 2	0	0	3	29	HG only	1.234e-05
Q68FY1	Nucleoporin NUP53	0	0	5	38	HG only	3.75365e-08
Q5U2Z3	Nucleosome assembly protein 1-like 4	0	0	11	165	HG only	3.45987e-43
Q63413	Spliceosome RNA helicase Bat1	6	48	1	1	-5.7747	7.62997e-12
Q6AXN4	Nucleoporin NDC1	7	42	1	1	-5.58205	6.90911e-10
Q505J6	Mitochondrial glutamate carrier 2 symporter 2)	2	25	1	1	-4.83359	0.00022869
P62842	40S ribosomal protein S15	2	25	1	1	-4.83359	0.00022869
Q61550	Double-strand-break repair protein rad21 homolog	4	24	1	1	-4.7747	0.00048106
Q9JHY1	Junctional adhesion molecule A precursor	3	23	1	1	-4.7133	0.00101127
Q6AXM5	Choline/ethanolaminephosphotransferase 1	1	20	1	1	-4.51166	0.00935284
Q9JJ46	3-beta-hydroxysteroid-Delta,Delta-isomerase -Delta sterol isomerase)	1	18	1	1	-4.35966	0.0410285
Q62600	Nitric-oxide synthase, endothelial	3	29	1	2	-4.04772	0.000137099
Q5BK32	UBX domain-containing protein 8	5	25	1	2	-3.83359	0.00236403
Q8C0L0	Thioredoxin domain-containing protein 13 precursor	3	23	1	2	-3.7133	0.00971107
Q9ESD7	Dysferlin	3	21	2	2	-3.58205	0.0395441
Q9WVA1	Mitochondrial import inner membrane translocase subunit Tim8 A	6	31	2	3	-3.55897	0.000249042
Q5XID7	Armadillo repeat-containing X-linked protein 3	4	28	2	3	-3.41213	0.00194972
Q9CZP5	Mitochondrial chaperone BCS1	5	28	2	3	-3.41213	0.00194972
Q91YN9	BAG family molecular chaperone regulator 2	3	26	1	3	-3.30521	0.00759342
P27274	CD59 glycoprotein precursor	3	51	2	4	-3.86216	1.63643e-09
Q63210	Guanine nucleotide-binding protein alpha-12 subunit	2	28	1	4	-2.99709	0.0099459
Q9ERA7	Mesothelin precursor	5	48	3	5	-3.45277	8.53258e-08
P08753	Guanine nucleotide-binding protein G subunit alpha alpha-3)	6	44	3	5	-3.32724	1.25599e-06
O08810	116 kDa U5 small nuclear ribonucleoprotein component	14	63	4	7	-3.35966	1.16179e-10
P24587	A-kinase anchor protein 5	8	51	4	7	-3.0548	3.08469e-07
P61227	Ras-related protein Rap-2b precursor	6	43	3	7	-2.80864	5.05255e-05
P40241	CD9 antigen	3	39	2	7	-2.66778	0.000607053
Q62470	Integrin alpha-3 precursor	5	35	3	7	-2.51166	0.00691983
P11608	ATP synthase protein 8	3	106	2	8	-3.91765	1.37519e-22
Q63632	Solute carrier family 12 member 4	4	34	4	8	-2.2772	0.0388927
O35049	Sphingomyelin phosphodiesterase 3	6	45	3	9	-2.51166	0.000192733
Q99376	Transferrin receptor protein 1	11	79	3	10	-3.17159	4.17555e-13
Q8VCQ6	Phosphatidylcholine:ceramide cholinephosphotransferase 1	1	47	3	11	-2.28489	0.000575299
P42667	Signal peptidase complex catalytic subunit SEC11A	3	41	2	11	-2.08785	0.0162852
P69897	Tubulin beta-5 chain	3	88	1	12	-3.0642	2.72721e-14
Q925S8	ATP-dependent metalloprotease YME1L1	8	50	5	12	-2.24863	0.000302712
P50431	Serine hydroxymethyltransferase, cytosolic	6	48	3	12	-2.18973	0.000926756
Q61656	Probable ATP-dependent RNA helicase DDX5	17	77	7	16	-2.45652	4.62324e-09
Q8C675	Glucose-6-phosphate isomerase	7	61	6	17	-2.03301	9.88551e-05
P52293	Importin subunit alpha-2	9	60	4	17	-2.00916	0.000167716
P13596	Neural cell adhesion molecule 1, 140 kDa isoform precursor	10	60	4	18	-1.9267	0.000406435
Q8K386	Ras-related protein Rab-15	1	51	2	18	-1.69223	0.0357622
P07340	Sodium/potassium-transporting ATPase subunit beta-1	4	70	5	19	-2.07109	5.27148e-06
Q9Z1X1	Protein FAM62A	12	65	6	20	-1.89017	0.000173667
Q9CPQ3	Mitochondrial import receptor subunit TOM22 homolog	4	79	2	21	-2.1012	2.81634e-07
O88775	Embigin precursor	4	60	2	21	-1.70431	0.00452569
P42225	Signal transducer and activator of transcription 1	1	1	4	23	4.33383	0.0203405
Q64380	Sarcosine dehydrogenase, mitochondrial precursor	1	1	5	25	4.45412	0.00597952
Q5U316	Ras-related protein Rab-35	7	67	5	26	-1.55538	0.006032
Q5EB77	Ras-related protein Rab-18	8	87	4	27	-1.87779	9.06662e-07
Q6P9V9	Tubulin alpha-1B chain	6	190	2	28	-2.95223	3.59752e-32
Q64632	Integrin beta-4 precursor	25	177	10	28	-2.84998	1.18555e-28
Q8BU14	Translocation protein SEC62	6	74	5	28	-1.59183	0.000986092
Q9D7N9	Adipocyte plasma membrane-associated protein	7	69	3	28	-1.4909	0.00917508
Q99KN9	Clathrin interactor 1	1	1	4	29	4.66825	0.000513273
P62902	60S ribosomal protein L31	6	67	5	29	-1.39784	0.0399385
P62268	40S ribosomal protein S23	6	104	4	31	-1.93598	4.87731e-09
Q00715	Histone H2B type 1	10	191	6	32	-2.76716	4.73568e-30
P11661	NADH-ubiquinone oxidoreductase chain 5	4	77	3	32	-1.45652	0.00353767
P43245	Multidrug resistance protein 1	21	141	4	34	-2.24182	2.31231e-16
P62850	40S ribosomal protein S24	3	107	4	34	-1.84374	1.31384e-08
Q9ESW4	Acylglycerol kinase, mitochondrial precursor	2	3	4	34	3.31277	0.00208837
Q8BYA0	Tubulin-specific chaperone D	1	1	4	35	4.93955	1.27405e-05
P06687	Sodium/potassium-transporting ATPase subunit alpha-3	15	93	8	35	-1.59961	2.1362e-05
Q63610	Tropomyosin alpha-3 chain	2	5	5	35	2.61762	0.0282461
Q62383	Transcription elongation factor SPT6	3	4	15	37	3.01972	0.00218962
Q99M87	DnaJ homolog subfamily A member 3, mitochondrial precursor	1	5	4	38	2.73627	0.00591231
Q9DBG7	Signal recognition particle receptor subunit alpha	13	96	7	39	-1.48929	7.82665e-05
Q9WV54	Acid ceramidase precursor	3	3	4	40	3.54723	6.87712e-05
Q63507	60S ribosomal protein L14	7	104	6	41	-1.53262	8.59968e-06
P04905	Glutathione S-transferase Mu 1	14	89	7	41	-1.30792	0.00460986
O70257	Syntaxin-7	5	111	6	42	-1.59183	7.41341e-07
P13221	Aspartate aminotransferase, cytoplasmic	16	118	9	43	-1.64611	6.1278e-08
Q3B8Q1	Nucleolar RNA helicase 2	20	107	10	44	-1.47177	1.57065e-05
Q6URW6	Myosin-14	5	7	14	44	2.46234	0.00407734
Q63524	Transmembrane emp24 domain-containing protein 2 precursor	8	114	6	45	-1.53077	1.42758e-06
Q925I1	ATPase family AAA domain-containing protein 3	15	148	7	46	-1.87563	3.42961e-13
Q9JJ54	Heterogeneous nuclear ribonucleoprotein D0	1	1	6	46	5.33383	1.41311e-08
P39052	Dynamin-2	2	10	3	51	2.16076	0.0046509
Q8C8U0	Liprin-beta-1	6	12	12	51	1.89773	0.0349609
P97521	Mitochondrial carnitine/acylcarnitine carrier protein	9	103	8	52	-1.17579	0.00613083
Q8BFZ9	Erlin-2 precursor	10	106	6	54	-1.16277	0.00533871
Q80VD1	Protein FAM98B	4	12	5	54	1.98019	0.00930625
P08011	Microsomal glutathione S-transferase 1	6	100	4	54	-1.0787	0.0444838
Q6DGG0	40 kDa peptidyl-prolyl cis-trans isomerase	18	167	10	55	-1.79208	4.08475e-14
P83732	60S ribosomal protein L24	6	133	6	56	-1.43766	3.93243e-07
P53534	Glycogen phosphorylase, brain form	6	11	16	58	2.20882	0.000523356
P17852	Integrin alpha-3 precursor	8	119	5	59	-1.20191	0.000508315
P14942	Glutathione S-transferase alpha-4	3	6	4	60	3.13219	2.10603e-07
Q9Z0K8	Pantetheinase precursor	3	114	4	60	-1.11573	0.00493583
P62853	40S ribosomal protein S25	8	113	7	61	-1.07918	0.0108758
Q66HG5	Transmembrane 9 superfamily protein member 2 precursor	8	148	10	62	-1.44499	2.69752e-08
P61107	Ras-related protein Rab-14	16	118	11	65	-1.05001	0.0110927
P21794	Hormone-induced protein 70 kDa	1	9	1	66	2.68473	8.39618e-07
P43406	Integrin alpha-V precursor	14	133	13	66	-1.20062	8.8642e-05
Q8BFY9	Transportin-1	16	121	12	69	-1.00007	0.0213518
Q9D8V0	Minor histocompatibility antigen H13	4	127	4	71	-1.02867	0.00679234
Q8VHV7	Heterogeneous nuclear ribonucleoprotein H	8	131	10	72	-1.05323	0.00273069
P30904	Macrophage migration inhibitory factor	7	178	5	74	-1.45601	1.28571e-10
Q63279	Keratin, type I cytoskeletal 19	5	14	14	74	2.21236	7.96599e-06
Q06826	Bone morphogenetic protein 4 precursor	1	15	2	74	2.11283	2.33505e-05
P97612	Fatty-acid amide hydrolase 1	14	132	11	76	-0.986201	0.010022
Q75Q40	Probable mitochondrial import receptor subunit TOM40 homolog	10	188	8	77	-1.47754	1.17804e-11
P62329	Thymosin beta-4	4	11	8	77	2.61762	4.75404e-08
P45878	FK506-binding protein 2 precursor	5	24	5	77	1.49209	0.0152553
P63281	SUMO-conjugating enzyme UBC9	3	25	6	77	1.4332	0.0303566
Q794E4	Heterogeneous nuclear ribonucleoprotein F	1	23	7	80	1.60863	0.00233086
Q5U2R7	Mesoderm development candidate 2	8	26	11	80	1.43175	0.0200038
P21708	Mitogen-activated protein kinase 3	4	9	8	81	2.98019	3.25174e-10
Q75Q39	Mitochondrial precursor proteins import receptor	19	228	16	86	-1.59636	1.06057e-16
Q9JID1	Programmed cell death protein 4	4	20	12	86	1.9146	1.56306e-05
O08839	Myc box-dependent-interacting protein 1	6	27	8	86	1.48164	0.00440049
P11030	Acyl-CoA-binding protein	5	29	7	88	1.41172	0.00822481
Q9EQS0	Transaldolase	23	238	13	90	-1.5927	1.81055e-17
Q6P7R8	Estradiol 17-beta-dehydrogenase 12	15	214	9	92	-1.40764	1.8176e-12
P47753	F-actin capping protein subunit alpha-1	4	20	7	94	2.04293	4.65763e-07
P42893	Endothelin-converting enzyme 1	17	163	11	94	-0.983873	0.000607947
Q8C7X2	Uncharacterized protein KIAA0090 precursor	14	174	13	99	-1.00332	0.000131136
Q5XIP9	Transmembrane protein 43	10	172	10	99	-0.986642	0.000247635
P24050	40S ribosomal protein S5	14	156	8	100	-0.83128	0.0410629
P42123	L-lactate dehydrogenase B chain	3	15	12	102	2.5758	3.34415e-11
Q63270	Iron-responsive element-binding protein 1	9	38	15	102	1.23476	0.0165785
P18420	Proteasome subunit alpha type 1	10	40	13	104	1.18878	0.0263736
O70133	ATP-dependent RNA helicase A	11	42	16	110	1.19931	0.011636
P62260	14-3-3 protein epsilon	7	39	11	114	1.35775	0.000532083
Q80YF6	Uroplakin-3B precursor	7	182	7	114	-0.864639	0.00280273
Q791V5	Mitochondrial carrier homolog 2	6	220	5	115	-1.1256	2.39366e-08
P54311	Guanine nucleotide-binding protein G/G/G subunit beta 1	10	195	5	115	-0.951574	8.57098e-05
P04762	Catalase	11	45	16	117	1.18878	0.00644574
O35286	Putative pre-mRNA-splicing factor ATP-dependent RNA helicase DHX15	12	46	12	117	1.15707	0.0109713
Q6RUV5	Ras-related C3 botulinum toxin substrate 1 precursor	13	182	9	119	-0.802711	0.0141114
P62859	40S ribosomal protein S28	4	42	7	122	1.34869	0.000217888
P98158	Low-density lipoprotein receptor-related protein 2 precursor	62	571	22	123	-2.40457	9.33617e-80
P27952	40S ribosomal protein S2	13	317	8	125	-1.53229	1.43081e-22
P00406	Cytochrome c oxidase subunit 2	8	242	13	126	-1.13132	1.59779e-09
P52827	39S ribosomal protein L12, mitochondrial precursor	8	50	6	129	1.17764	0.00216743
P00762	Anionic trypsin-1 precursor	1	250	1	130	-1.13315	5.97631e-10
Q9D6M3	Mitochondrial glutamate carrier 1	2	35	8	131	1.71441	5.18411e-08
Q63584	Transmembrane emp24 domain-containing protein 10 precursor	7	267	8	136	-1.16297	2.35717e-11
P29147	D-beta-hydroxybutyrate dehydrogenase, mitochondrial	13	51	11	136	1.2253	0.000406354
P45953	Very-long-chain specific acyl-CoA dehydrogenase, mitochondrialprecursor	8	45	11	137	1.41644	7.79869e-06
Q63377	Sodium/potassium-transporting ATPase subunit beta-3	6	217	6	140	-0.822002	0.000799853
Q920A6	Retinoid-inducible serine carboxypeptidase precursor	6	51	9	141	1.27739	7.97965e-05
Q9QXY6	EH domain-containing protein 3	6	67	11	151	0.982581	0.0124264
P97852	Peroxisomal multifunctional enzyme type 2	9	21	14	153	2.67534	7.48911e-19
P15651	Short-chain specific acyl-CoA dehydrogenase, mitochondrial precursor	8	64	11	153	1.06765	0.00180453
P17077	60S ribosomal protein L9	9	248	8	156	-0.858528	2.7114e-05
Q9Z1E1	Flotillin-1	16	240	12	156	-0.811223	0.000243607
Q5RKI1	Eukaryotic initiation factor 4A-II	16	230	17	162	-0.695374	0.0171747
P05712	Ras-related protein Rab-2A	11	254	9	168	-0.786101	0.00023491
P29266	3-hydroxyisobutyrate dehydrogenase, mitochondrial precursor	7	67	11	170	1.15357	5.05057e-05
P27605	Hypoxanthine-guanine phosphoribosyltransferase	16	297	12	173	-0.969425	5.99769e-09
P41123	60S ribosomal protein L13	14	243	13	173	-0.679918	0.0143445
P11915	Nonspecific lipid-transfer protein	9	32	16	174	2.25321	2.07562e-17
P49242	40S ribosomal protein S3a	19	245	23	174	-0.683429	0.011658
Q8CG62	Kinectin	22	372	20	180	-1.23704	1.01672e-18
P62832	60S ribosomal protein L23	7	275	8	183	-0.777322	8.82292e-05
P62250	40S ribosomal protein S16	12	253	8	183	-0.657028	0.0182376
Q9D6Z1	Nucleolar protein 5A	11	72	11	188	1.19493	2.68167e-06
Q794F9	4F2 cell-surface antigen heavy chain	21	409	17	190	-1.29584	1.47626e-22
P11507	Sarcoplasmic/endoplasmic reticulum calcium ATPase 2 -ATPase 2) ATPase)	22	305	18	191	-0.864971	3.32504e-07
Q6NYB7	Ras-related protein Rab-1A	12	336	17	192	-0.997089	4.66052e-11
Q60587	Trifunctional enzyme subunit beta, mitochondrial precursor	12	92	13	193	0.879161	0.00595261
P13676	Acylamino-acid-releasing enzyme	12	90	18	195	0.925743	0.00162818
P62815	Vacuolar ATP synthase subunit B, brain isoform	9	75	14	201	1.2325	2.25905e-07
O88761	26S proteasome non-ATPase regulatory subunit 1	20	99	24	201	0.831961	0.0115027
P43138	DNA- lyase	11	100	17	209	0.873769	0.00239193
P07151	Beta-2-microglobulin precursor	6	97	5	216	0.96524	0.000119004
O54975	Xaa-Pro aminopeptidase 1	14	109	20	217	0.803633	0.00931284
P13084	Nucleophosmin	22	352	14	223	-0.848266	2.50563e-08
P08461	Dihydrolipoyllysine-residue acetyltransferase component of pyruvatedehydrogenase complex, mitochondrial precursor	14	303	11	232	-0.574927	0.0354998
Q8VHF5	Citrate synthase, mitochondrial precursor	10	85	12	241	1.31376	1.50252e-10
P09527	Ras-related protein Rab-7a	14	332	10	259	-0.547965	0.0337882
Q5XIH7	Prohibitin-2	17	446	19	260	-0.968266	1.32431e-14
Q63608	Tropomyosin alpha-1 chain	34	410	32	260	-0.846846	4.59743e-10
Q64522	Histone H2A type 2-B	5	349	4	260	-0.61445	0.00135419
P52296	Importin subunit beta-1	34	337	29	265	-0.53649	0.0436827
Q8CAQ8	Mitochondrial inner membrane protein	18	345	17	266	-0.564904	0.0114449
Q8VIF7	Selenium-binding protein 1	21	138	27	281	0.836168	8.30354e-05
O54734	Dolichyl-diphosphooligosaccharide--protein glycosyltransferase 48 kDasubunit precursor	13	498	12	291	-0.964861	1.8103e-16
Q80X90	Filamin-B	65	443	47	312	-0.695495	3.7536e-07
P48675	Desmin	17	181	22	313	0.600439	0.0491035
O88569	Heterogeneous nuclear ribonucleoproteins A2/B1	35	507	30	314	-0.880955	4.39982e-14
P80317	T-complex protein 1 subunit zeta	30	423	20	326	-0.56552	0.000727936
P13383	Nucleolin	42	608	27	329	-1.07572	3.96169e-25
P62243	40S ribosomal protein S8	15	426	10	329	-0.5625	0.000756586
P04937	Fibronectin precursor	52	770	34	330	-1.41213	5.14568e-51
Q63965	Sideroflexin-1	13	492	12	334	-0.748544	1.1098e-09
Q62261	Spectrin beta chain, non-erythrocytic 1	35	148	55	337	0.997417	2.88855e-09
P11232	Thioredoxin	11	189	9	339	0.653165	0.00314657
Q9JLT0	Myosin-10	30	165	34	350	0.895155	1.03396e-07
Q6P9T8	Tubulin beta-2C chain	11	457	10	353	-0.56226	0.000262529
O08557	NG,NG-dimethylarginine dimethylaminohydrolase 1	19	193	22	355	0.689484	0.000415652
P08113	Endoplasmin precursor	12	127	19	368	1.34514	4.43266e-18
P63245	Guanine nucleotide-binding protein subunit beta 2-like 1	20	543	15	369	-0.747066	6.8855e-11
O35783	Calumenin precursor	18	205	27	369	0.658263	0.000791557
P62703	40S ribosomal protein S4, X isoform	24	566	11	370	-0.803011	2.66933e-13
P14668	Annexin A5	18	175	18	371	0.89433	2.63954e-08
P17764	Acetyl-CoA acetyltransferase, mitochondrial precursor	12	222	18	371	0.551125	0.0413018
P04897	Guanine nucleotide-binding protein G, alpha-2 subunit	11	515	11	378	-0.63592	4.50896e-07
Q920L2	Succinate dehydrogenase flavoprotein subunit,mitochondrial precursor	16	226	19	390	0.597417	0.00402242
P49134	Integrin beta-1 precursor	24	550	21	406	-0.627686	1.73898e-07
O89049	Thioredoxin reductase 1, cytoplasmic	29	517	19	416	-0.503315	0.000859365
P04642	L-lactate dehydrogenase A chain	33	546	25	417	-0.578588	4.55289e-06
Q05962	ADP/ATP translocase 1	26	681	17	436	-0.833061	1.04428e-17
P29315	Ribonuclease inhibitor	26	691	21	451	-0.805292	7.53959e-17
P62737	Actin, aortic smooth muscle	14	152	20	454	1.38889	4.31908e-24
P69893	Tubulin beta-1 chain	25	561	22	464	-0.46361	0.0022842
P24368	Peptidyl-prolyl cis-trans isomerase B precursor	16	299	14	482	0.499153	0.0163378
Q6P6R2	Dihydrolipoyl dehydrogenase, mitochondrial precursor	16	252	20	505	0.813125	5.32094e-10
Q7M0E3	Destrin	23	235	18	528	0.978143	2.72552e-15
P16086	Spectrin alpha chain, brain	56	261	68	535	0.845755	1.19268e-11
O08795	Glucosidase 2 subunit beta precursor	12	336	10	545	0.508061	0.00228615
P81155	Voltage-dependent anion-selective channel protein 2	14	667	12	546	-0.47852	6.61606e-05
P06685	Sodium/potassium-transporting ATPase subunit alpha-1 precursor /K ATPase alpha-1subunit)	34	683	30	561	-0.473619	6.09611e-05
P26231	Catenin alpha-1	28	213	33	584	1.26538	4.01923e-27
P07153	Dolichyl-diphosphooligosaccharide--protein glycosyltransferase 67 kDasubunit precursor	34	718	27	624	-0.392172	0.00531225
Q61941	NAD transhydrogenase, mitochondrial precursor	33	795	28	629	-0.527629	4.76212e-08
P30427	Plectin-1	66	291	97	730	1.13714	9.07638e-29
P02401	60S acidic ribosomal protein P2	9	486	11	762	0.459101	0.000252793
P11884	Aldehyde dehydrogenase, mitochondrial precursor	21	463	20	771	0.545985	5.69662e-07
P04906	Glutathione S-transferase P	25	907	25	816	-0.342268	0.0069925
Q63617	Hypoxia up-regulated protein 1 precursor	37	522	40	849	0.511981	8.80038e-07
P10111	Peptidyl-prolyl cis-trans isomerase A	17	594	14	869	0.359159	0.0204677
P07150	Annexin A1	53	1053	44	930	-0.368937	0.000103285
P08712	Endoplasmin	36	468	35	954	0.837747	3.34199e-22
Q8BTM8	Filamin-A	117	1193	85	983	-0.469065	3.01799e-10
Q9Z2L0	Voltage-dependent anion-selective channel protein 1	15	1170	14	1032	-0.3708	1.3648e-05
P10860	Glutamate dehydrogenase 1, mitochondrial precursor	30	599	29	1034	0.597874	2.06507e-12
Q3T1J1	Eukaryotic translation initiation factor 5A-1	17	341	19	1056	1.44103	2.11759e-62
P16617	Phosphoglycerate kinase 1	43	1305	41	1134	-0.392363	1.58276e-07
Q69ZN7	Myoferlin	73	1510	66	1169	-0.559008	1.27603e-19
P07943	Aldose reductase	32	614	29	1257	0.84394	2.25618e-30
P48679	Lamin-A	39	511	40	1404	1.26841	1.72096e-68
P62630	Elongation factor 1-alpha 1	27	1029	37	1455	0.310042	0.000924165
P62804	Histone H4	17	1795	11	1625	-0.333278	1.18779e-07
P05065	Fructose-bisphosphate aldolase A	39	1194	37	1770	0.378212	1.45417e-08
P15999	ATP synthase subunit alpha, mitochondrial precursor	31	1274	30	1779	0.291967	0.000245826
P25113	Phosphoglycerate mutase 1	24	861	26	1805	0.87818	8.05629e-48
P50137	Transketolase	50	1349	49	1866	0.278324	0.000479538
P35565	Calnexin precursor	39	1048	40	1959	0.712745	1.00276e-35
P11598	Protein disulfide-isomerase A3 precursor	59	1625	50	2267	0.290611	3.87999e-06
Q71FK5	Actin, cytoplasmic 1	14	936	15	2279	1.09409	1.58734e-88
P18418	Calreticulin precursor	38	1602	41	2321	0.345138	1.02348e-09
P63018	Heat shock cognate 71 kDa protein	40	2062	40	3039	0.369818	1.202e-15
P05197	Elongation factor 2	84	2255	69	3058	0.249727	3.14327e-06
P63039	60 kDa heat shock protein, mitochondrial precursor	55	2017	58	3380	0.555078	9.26173e-40
P04764	Alpha-enolase	40	4361	38	7975	0.681091	5.27239e-140
P11505	Plasma membrane calcium-transporting ATPase 1	5	13	0	0	NG only	0.0704513
Q61765	Keratin, type I cuticular Ha1	3	13	0	0	NG only	0.0704513
P06214	Delta-aminolevulinic acid dehydratase	4	12	0	0	NG only	0.15643
P63174	60S ribosomal protein L38	3	12	0	0	NG only	0.15643
P38718	Brain protein 44	2	12	0	0	NG only	0.15643
Q9CWU6	Basic FGF-repressed Zic-binding protein	1	12	0	0	NG only	0.15643
Q61703	Inter-alpha-trypsin inhibitor heavy chain H2 precursor	3	12	0	0	NG only	0.15643
Q9DB43	Zinc finger protein-like 1	3	12	0	0	NG only	0.15643
O35451	Cyclic AMP-dependent transcription factor ATF-6 beta	2	11	0	0	NG only	0.348357
P20854	Hemoglobin subunit alpha	1	11	0	0	NG only	0.348357
Q5RL79	Keratinocytes-associated protein 2	2	11	0	0	NG only	0.348357
Q8K2H2	OTU domain-containing protein 6B	1	11	0	0	NG only	0.348357
Q6PCT8	Succinate dehydrogenase cytochrome b small subunit,mitochondrial precursor	4	10	0	0	NG only	0.778437
P48508	Glutamate--cysteine ligase regulatory subunit	5	10	0	0	NG only	0.778437
P98200	Phospholipid-transporting ATPase IB	2	10	0	0	NG only	0.778437
Q8BS95	Protein GPR89A	2	10	0	0	NG only	0.778437
O88202	60 kDa lysophospholipase	1	10	0	0	NG only	0.778437
Q08603	Geranylgeranyl transferase type-2 subunit beta	2	10	0	0	NG only	0.778437
Q63638	Striated muscle-specific serine/threonine protein kinase	1	10	0	0	NG only	0.778437
Q06806	Tyrosine-protein kinase receptor Tie-1	4	10	0	0	NG only	0.778437
Q8C0E3	Tripartite motif-containing protein 47	3	10	0	0	NG only	0.778437
Q9DCJ5	NADH dehydrogenase 1 alpha subcomplex subunit 8	3	16	1	1	-4.18973	0.179202
Q920A7	AFG3-like protein 1	3	14	1	1	-3.99709	0.778554
P19225	Cytochrome P450 2C70	2	14	1	1	-3.99709	0.778554
Q60870	Polyposis locus protein 1 homolog	2	14	1	1	-3.99709	0.778554
Q8VHI3	GDP-fucose protein O-fucosyltransferase 2 precursor	3	14	1	1	-3.99709	0.778554
Q922U1	U4/U6 small nuclear ribonucleoprotein Prp3	5	14	1	1	-3.99709	0.778554
P62864	40S ribosomal protein S30	1	14	1	1	-3.99709	0.778554
Q9JJ25	Pyrin	5	10	1	1	-3.51166	1
Q9R1K9	Centrin-2	2	10	1	1	-3.51166	1
Q9QZH0	Frizzled-4 precursor	2	10	1	1	-3.51166	1
P59759	MKL/myocardin-like protein 2	1	10	1	1	-3.51166	1
Q9CQE3	28S ribosomal protein S17, mitochondrial	3	10	1	1	-3.51166	1
P08082	Clathrin light chain B	1	11	1	1	-3.64917	1
Q63186	Translation initiation factor eIF-2B subunit delta	7	11	1	1	-3.64917	1
Q99NB1	Acetyl-coenzyme A synthetase 2-like, mitochondrial precursor	1	12	1	1	-3.7747	1
Q61789	Laminin subunit alpha-3	4	12	1	1	-3.7747	1
Q5RKL5	Metalloreductase STEAP3	5	12	1	1	-3.7747	1
Q91VU0	Protein FAM3C precursor	3	17	2	2	-3.2772	0.63453
Q9JKK8	Serine/threonine-protein kinase ATR	6	10	2	2	-2.51166	1
Q9D1Q4	Dolichol-phosphate mannosyltransferase subunit 3	1	10	1	2	-2.51166	1
Q9D6Z1	Nucleolar protein 56	4	10	2	2	-2.51166	1
Q4KLN6	Ribonucleoside-diphosphate reductase M2 subunit	3	10	1	2	-2.51166	1
Q9CRT8	Exportin-T )	3	10	1	2	-2.51166	1
O54992	MAP kinase-activated protein kinase 5	1	11	2	2	-2.64917	1
Q9QYF1	Retinol dehydrogenase 11	1	11	2	2	-2.64917	1
P17932	60S ribosomal protein L32'	4	11	2	2	-2.64917	1
Q5NC05	Transcription termination factor 2	2	11	1	2	-2.64917	1
Q5U220	Protein C10orf57 homolog	1	12	1	2	-2.7747	1
O88574	Histone deacetylase complex subunit SAP30	3	12	1	2	-2.7747	1
Q9CWU2	Probable palmitoyltransferase ZDHHC13	3	12	2	2	-2.7747	1
O35161	Cadherin EGF LAG seven-pass G-type receptor 1	2	13	2	2	-2.89017	1
Q5BJP2	Protein CWC15 homolog	4	13	1	2	-2.89017	1
Q64331	Myosin-VI	3	13	2	2	-2.89017	1
Q8K1J6	tRNA-nucleotidyltransferase 1, mitochondrial precursor	2	13	2	2	-2.89017	1
Q6A009	Zinc finger protein 294	3	13	2	2	-2.89017	1
O08722	Netrin receptor UNC5B precursor	5	14	2	2	-2.99709	1
P25304	Agrin precursor	4	14	2	2	-2.99709	1
Q8K363	ATP-dependent RNA helicase DDX18	5	14	2	2	-2.99709	1
Q5XI41	Translocation-associated membrane protein 1	3	14	1	2	-2.99709	1
Q6P7B9	Acyl-CoA desaturase 2 -desaturase 2)	2	15	1	2	-3.09662	1
P02088	Hemoglobin subunit beta-1	1	15	1	2	-3.09662	1
Q99LC3	NADH-ubiquinone oxidoreductase 42 kDa subunit, mitochondrial precursor	3	15	2	2	-3.09662	1
Q99P75	Ras-related protein Rab-9	4	15	1	2	-3.09662	1
Q920G2	Na/H exchange regulatory cofactor NHE-RF2	5	16	2	2	-3.18973	1
Q9D1L0	Coiled-coil-helix-coiled-coil-helix domain-containing protein 2	2	16	1	2	-3.18973	1
P63274	40S ribosomal protein S17	2	23	1	3	-3.12833	0.0570937
Q8CG47	Structural maintenance of chromosomes protein 4	3	21	2	3	-2.99709	0.215357
Q8BHL4	Retinoic acid-induced protein 3	3	20	2	3	-2.9267	0.41573
Q61072	ADAM 9 precursor	5	19	1	3	-2.8527	0.798921
O35219	Potassium voltage-gated channel subfamily H member 2	1	19	1	3	-2.8527	0.798921
P13539	Myosin-6	2	19	3	3	-2.8527	0.798921
Q8VDQ1	Zinc-binding alcohol dehydrogenase domain-containing protein 1	1	19	1	3	-2.8527	0.798921
P28494	Alpha-mannosidase 2	3	10	2	3	-1.9267	1
Q66H99	Nucleolar protein 10	2	10	2	3	-1.9267	1
P55194	SH3 domain-binding protein 1	2	10	1	3	-1.9267	1
Q7TN31	Angiogenic factor with G patch and FHA domains 1	3	10	2	3	-1.9267	1
Q64244	ADP-ribosyl cyclase 1	1	10	1	3	-1.9267	1
Q62818	Translation initiation factor eIF-2B subunit beta	3	10	1	3	-1.9267	1
P80447	Glyceraldehyde-3-phosphate dehydrogenase, liver	2	10	1	3	-1.9267	1
P49718	DNA replication licensing factor MCM5	2	10	3	3	-1.9267	1
Q8BQP8	Rab11 family-interacting protein 4	1	10	3	3	-1.9267	1
O35156	UTP--glucose-1-phosphate uridylyltransferase 1	4	10	1	3	-1.9267	1
Q03172	Zinc finger protein 40	2	10	3	3	-1.9267	1
Q9ESU3	Zinc finger protein 106	3	10	2	3	-1.9267	1
Q4KLJ8	Phosducin-like protein 3	2	11	2	3	-2.0642	1
Q62935	von Willebrand factor	3	11	1	3	-2.0642	1
Q61846	Maternal embryonic leucine zipper kinase	3	11	3	3	-2.0642	1
Q61728	Interleukin-12 subunit alpha	1	12	1	3	-2.18973	1
Q60865	GPI-anchored protein p137	4	13	3	3	-2.30521	1
Q6MFY8	Tripartite motif-containing protein 40	1	13	1	3	-2.30521	1
P59808	SAM and SH3 domain-containing protein 1	4	15	3	3	-2.51166	1
P10148	Small inducible cytokine A2 precursor	3	16	1	3	-2.60477	1
Q9JHS3	Mitogen-activated protein-binding protein-interacting protein	3	16	2	3	-2.60477	1
Q62718	Neurotrimin precursor	4	17	2	3	-2.69223	1
Q99LY9	NADH dehydrogenase iron-sulfur protein 5	1	17	1	3	-2.69223	1
P52591	Nuclear envelope pore membrane protein POM 121	3	24	3	4	-2.7747	0.131182
Q91YT0	NADH-ubiquinone oxidoreductase 51 kDa subunit, mitochondrial precursor	8	23	2	4	-2.7133	0.247405
Q9R099	Transducin beta-like 2 protein	4	22	3	4	-2.64917	0.46437
O35152	BET1-like protein	1	21	1	4	-2.58205	0.867115
O54751	Cone-rod homeobox protein	1	10	1	4	-1.51166	1
Q6P501	Lysosomal-associated transmembrane protein 4A	2	10	1	4	-1.51166	1
Q810C1	SLIT and NTRK-like protein 1	1	10	1	4	-1.51166	1
P97297	ADM	1	11	2	4	-1.64917	1
Q8VD65	Phosphoinositide 3-kinase regulatory subunit 4	3	11	3	4	-1.64917	1
O35621	Phosphomannomutase 1	6	11	2	4	-1.64917	1
Q8BXN9	Transmembrane protein 87A precursor	2	11	1	4	-1.64917	1
P80432	Cytochrome c oxidase subunit 7C, mitochondrial	2	12	2	4	-1.7747	1
O88428	Bifunctional 3'-phosphoadenosine 5'-phosphosulfate synthase 2	1	12	2	4	-1.7747	1
Q5PQX0	UDP-glucuronic acid decarboxylase 1	2	13	3	4	-1.89017	1
O70159	Alpha-2-HS-glycoprotein	1	13	1	4	-1.89017	1
Q8CCK0	Core histone macro-H2A2	5	13	2	4	-1.89017	1
Q0VBD2	Protein MCM10 homolog	2	13	1	4	-1.89017	1
P36940	Tumor necrosis factor ligand superfamily member 6	2	14	1	4	-1.99709	1
Q3TC72	Fumarylacetoacetate hydrolase domain-containing protein 2A	2	15	1	4	-2.09662	1
P97279	Inter-alpha-trypsin inhibitor heavy chain H2 precursor	4	16	1	4	-2.18973	1
Q61881	DNA replication licensing factor MCM7	5	16	3	4	-2.18973	1
Q6P767	Pituitary tumor-transforming gene 1 protein-interacting proteinprecursor	2	17	2	4	-2.2772	1
P70698	CTP synthase 1	5	17	1	4	-2.2772	1
Q8CHJ1	GPI transamidase component PIG-U	5	27	1	5	-2.62269	0.0754979
P04639	Apolipoprotein A-I precursor	2	10	4	5	-1.18973	1
Q9JIL8	DNA repair protein RAD50	9	10	4	5	-1.18973	1
Q6PAJ1	Breakpoint cluster region protein	1	10	1	5	-1.18973	1
Q62696	Disks large homolog 1	5	11	4	5	-1.32724	1
Q62844	Proto-oncogene tyrosine-protein kinase Fyn	5	11	3	5	-1.32724	1
Q6GMN2	Brain-specific angiogenesis inhibitor 1-associated protein 2	1	11	2	5	-1.32724	1
P97452	Ribosome biogenesis protein BOP1	2	11	2	5	-1.32724	1
Q9JL60	Glucocorticoid modulatory element-binding protein 1	1	11	1	5	-1.32724	1
P49717	DNA replication licensing factor MCM4	4	12	1	5	-1.45277	1
Q9CZ54	RING finger and SPRY domain-containing protein 1 precursor	1	12	1	5	-1.45277	1
Q5I0L3	Tyrosyl-tRNA synthetase, mitochondrial precursor	2	13	2	5	-1.56825	1
Q9R1C7	Pre-mRNA-processing factor 40 homolog A	5	14	2	5	-1.67516	1
Q8BZM1	Glomulin	3	16	1	5	-1.86781	1
Q9DCF1	Transmembrane protein 25	1	16	1	5	-1.86781	1
Q76K24	Ankyrin repeat domain-containing protein 46	2	17	1	5	-1.95527	1
O54833	Casein kinase II subunit alpha'	6	17	3	5	-1.95527	1
P51150	Ras-related protein Rab-7	6	17	3	5	-1.95527	1
P35441	Thrombospondin-1 precursor	4	17	4	5	-1.95527	1
Q6AYY8	Acetyl-coenzyme A transporter 1	5	18	2	5	-2.03773	1
Q8K586	GTP-binding nuclear protein Ran, testis-specific isoform	7	18	2	5	-2.03773	1
Q8VC42	Uncharacterized protein C18orf8 homolog	2	18	1	5	-2.03773	1
O54763	Alpha-1-antiproteinase precursor	2	21	2	5	-2.26012	1
P27661	Histone H2Ax	2	28	1	6	-2.41213	0.139319
P58064	Mitochondrial 28S ribosomal protein S6	2	9	3	6	-0.774697	1
Q07803	Elongation factor G 1, mitochondrial precursor	3	10	4	6	-0.9267	1
Q62599	Metastasis-associated protein MTA1	3	10	4	6	-0.9267	1
Q62636	Ras-related protein Rap-1b precursor	3	10	3	6	-0.9267	1
P13516	Acyl-CoA desaturase 1	2	10	1	6	-0.9267	1
O35874	Neutral amino acid transporter A	2	10	1	6	-0.9267	1
Q6ZQ58	La-related protein 1	4	11	3	6	-1.0642	1
P28077	Proteasome subunit beta type 9 precursor	4	12	1	6	-1.18973	1
Q8BWP8	N-acetyllactosaminide beta-1,3-N-acetylglucosaminyltransferase	1	12	2	6	-1.18973	1
Q8C156	Condensin complex subunit 2	2	12	1	6	-1.18973	1
P02773	Alpha-fetoprotein precursor	1	12	1	6	-1.18973	1
P70587	Leucine-rich repeat-containing protein 7	1	12	1	6	-1.18973	1
Q03309	Zinc finger protein 46	1	12	1	6	-1.18973	1
Q6A078	Centrosomal protein Cep290	2	13	1	6	-1.30521	1
Q6ZPR5	Sphingomyelin phosphodiesterase 4	5	13	2	6	-1.30521	1
P48437	Homeobox prospero-like protein PROX1	3	13	5	6	-1.30521	1
Q9CPV7	Probable palmitoyltransferase ZDHHC6	1	13	1	6	-1.30521	1
Q9CZ04	COP9 signalosome complex subunit 7a	3	14	2	6	-1.41213	1
Q6PAQ4	RNA exonuclease 4	2	14	2	6	-1.41213	1
Q62417	Sorbin and SH3 domain-containing protein 1	3	14	2	6	-1.41213	1
P52504	NADH dehydrogenase iron-sulfur protein 6, mitochondrialprecursor	3	15	3	6	-1.51166	1
Q8CHI8	E1A-binding protein p400	4	15	4	6	-1.51166	1
Q4V7E8	Leucine-rich repeat flightless-interacting protein 2	4	15	2	6	-1.51166	1
Q8BGA9	Inner membrane protein OXA1L, mitochondrial precursor	2	15	3	6	-1.51166	1
P97300	Stromal cell-derived receptor 1 precursor	2	15	2	6	-1.51166	1
Q5H8C4	Vacuolar protein sorting-associated protein 13A	3	15	2	6	-1.51166	1
Q9EP72	Uncharacterized protein C15orf24 homolog precursor	3	16	2	6	-1.60477	1
Q9ESQ7	PH and SEC7 domain-containing protein 1	6	16	3	6	-1.60477	1
Q9WV97	Mitochondrial import inner membrane translocase subunit Tim9	2	16	1	6	-1.60477	1
Q62967	Diphosphomevalonate decarboxylase decarboxylase)	5	19	3	6	-1.8527	1
Q9JJP9	Ubiquilin-1	2	19	3	6	-1.8527	1
Q9CWM4	Prefoldin subunit 1	3	19	1	6	-1.8527	1
Q5U305	ER lumen protein retaining receptor 2	4	20	1	6	-1.9267	1
Q9R0U0	FUS-interacting serine-arginine-rich protein 1	2	20	4	6	-1.9267	1
Q6P2L7	Protein CASC4	3	21	2	6	-1.99709	1
Q924Z5	Translocation-associated membrane protein 2	1	21	1	6	-1.99709	1
Q99KE8	Zinc finger protein 64	2	22	2	6	-2.0642	1
O08653	Telomerase protein component 1	8	23	5	6	-2.12833	1
Q6NWW9	Fibronectin type III domain-containing protein 3B	3	24	1	6	-2.18973	1
Q9ER64	Oxysterol-binding protein-related protein 5	5	28	2	7	-2.18973	0.41638
Q5U2V8	Transmembrane protein 111	2	27	2	7	-2.13727	0.732334
Q63635	Syntaxin-6	4	10	1	7	-0.704307	1
P17156	Heat shock-related 70 kDa protein 2	5	10	5	7	-0.704307	1
P62257	Ubiquitin-conjugating enzyme E2 H	3	10	2	7	-0.704307	1
Q8BWJ3	Phosphorylase b kinase regulatory subunit alpha, liver isoform	1	11	4	7	-0.841811	1
Q9DAZ9	Zinc finger FYVE domain-containing protein 19	2	11	1	7	-0.841811	1
P84079	ADP-ribosylation factor 1	5	12	3	7	-0.967342	1
Q00900	Human immunodeficiency virus type I enhancer-binding protein 2 homolog	3	12	4	7	-0.967342	1
Q91VN4	Coiled-coil-helix-coiled-coil-helix domain-containing protein 6	3	12	3	7	-0.967342	1
Q9ERY9	Probable ergosterol biosynthetic protein 28	1	12	1	7	-0.967342	1
Q9EQW7	Kinesin-like protein KIF13A	5	12	4	7	-0.967342	1
Q91VD9	NADH-ubiquinone oxidoreductase 75 kDa subunit, mitochondrial precursor	7	12	2	7	-0.967342	1
Q62190	Macrophage-stimulating protein receptor precursor	3	12	3	7	-0.967342	1
Q52KI8	Serine/arginine repetitive matrix protein 1	4	12	5	7	-0.967342	1
P52759	Ribonuclease UK114	3	12	1	7	-0.967342	1
P62078	Mitochondrial import inner membrane translocase subunit Tim8 B	3	13	2	7	-1.08282	1
Q9CQI6	Coactosin-like protein	4	13	2	7	-1.08282	1
Q04753	Methylosome subunit pICln )	3	14	2	7	-1.18973	1
Q9EPF2	Cell surface glycoprotein MUC18 precursor	4	14	3	7	-1.18973	1
Q99LI7	Cleavage stimulation factor 77 kDa subunit	5	14	4	7	-1.18973	1
Q8VHL1	Histone-lysine N-methyltransferase, H3 lysine-4 specific SET7	2	15	1	7	-1.28927	1
Q9CQW0	Transmembrane protein 93	2	15	1	7	-1.28927	1
Q80ZK9	WD and tetratricopeptide repeats protein 1	2	15	2	7	-1.28927	1
Q4FZU2	Keratin, type II cytoskeletal 6A	3	16	2	7	-1.38238	1
Q9QZ73	DCN1-like protein 1	2	16	2	7	-1.38238	1
P70564	Serpin B5 precursor	1	16	2	7	-1.38238	1
O54941	SWI/SNF-related matrix-associated actin-dependent regulator chromatinsubfamily E member 1	5	17	2	7	-1.46984	1
P49070	Calcium signal-modulating cyclophilin ligand	1	18	1	7	-1.5523	1
Q8R1S0	Ubiquinone biosynthesis monooxygenase COQ6, mitochondrial	3	18	1	7	-1.5523	1
Q922H2	] kinase isozyme 3, mitochondrialprecursor	3	19	3	7	-1.63031	1
Q7TPH6	Probable E3 ubiquitin-protein ligase MYCBP2	9	21	5	7	-1.7747	1
P56716	Oxygen-regulated protein 1	2	21	3	7	-1.7747	1
Q10743	ADAM 10 precursor	4	23	3	7	-1.90594	1
Q9R0A3	Spermatogenesis-associated protein 7 homolog	3	23	3	7	-1.90594	1
Q61686	Chromobox protein homolog 5	4	23	4	7	-1.90594	1
Q09167	Splicing factor, arginine/serine-rich 5	7	24	2	7	-1.96734	1
Q6AYS5	Transmembrane protein 98	3	24	1	7	-1.96734	1
Q8BL97	Splicing factor, arginine/serine-rich 7	5	25	2	7	-2.02624	1
O70378	Neighbor of COX4	4	32	4	8	-2.18973	0.1214
O35774	A-kinase anchor protein 4 precursor	2	10	2	8	-0.511662	1
P51650	Succinate semialdehyde dehydrogenase -dependentsuccinic semialdehyde dehydrogenase)	5	10	4	8	-0.511662	1
Q9DC16	ER-Golgi intermediate compartment 32 kDa protein	3	10	3	8	-0.511662	1
Q9ESK9	RB1-inducible coiled-coil protein 1	2	10	4	8	-0.511662	1
P54757	Ephrin type-A receptor 5	2	11	3	8	-0.649166	1
P52925	High mobility group protein 2	9	11	6	8	-0.649166	1
Q9ERE6	Myosin phosphatase Rho-interacting protein	4	11	4	8	-0.649166	1
P12839	Neurofilament medium polypeptide	6	11	4	8	-0.649166	1
Q8VEH5	EPM2A-interacting protein 1	1	11	4	8	-0.649166	1
P14646	cAMP-specific 3',5'-cyclic phosphodiesterase 4B	1	12	1	8	-0.774697	1
Q9Z280	Phospholipase D1	1	12	1	8	-0.774697	1
Q66H50	Fatty acyl-CoA reductase 1	2	14	1	8	-0.997089	1
Q8VE62	Polyadenylate-binding protein-interacting protein 1 -bindingprotein-interacting protein 1)	2	14	3	8	-0.997089	1
Q9JJ50	Hepatocyte growth factor-regulated tyrosine kinase substrate	3	15	3	8	-1.09662	1
P62275	40S ribosomal protein S29	2	15	2	8	-1.09662	1
Q63617	150 kDa oxygen-regulated protein precursor	5	15	4	8	-1.09662	1
Q8BWB1	Synaptopodin 2-like protein	3	15	1	8	-1.09662	1
Q9ES00	Ubiquitin conjugation factor E4 B	3	15	3	8	-1.09662	1
Q791T5	Mitochondrial carrier homolog 1	6	16	1	8	-1.18973	1
Q64008	Ras-related protein Rab-34	2	16	1	8	-1.18973	1
Q9Z330	DNA -methyltransferase 1	4	17	6	8	-1.2772	1
Q9QW30	Neurogenic locus notch homolog protein 2 precursor	3	17	3	8	-1.2772	1
P43432	Interleukin-12 subunit beta	2	17	2	8	-1.2772	1
Q8BKX6	Serine/threonine-protein kinase SMG1	2	18	4	8	-1.35966	1
Q6TEK4	Vitamin K epoxide reductase complex subunit 1	1	18	1	8	-1.35966	1
O70127	Bile salt export pump	3	19	4	8	-1.43766	1
P53702	Cytochrome c-type heme lyase	4	19	2	8	-1.43766	1
Q99J86	Attractin precursor	3	21	2	8	-1.58205	1
Q6PEC1	Tubulin-specific chaperone A	4	26	1	8	-1.89017	1
Q8CGU6	Nicastrin precursor	4	28	3	8	-1.99709	1
P37880	Arginyl-tRNA synthetase, cytoplasmic	8	35	3	9	-2.14909	0.0623198
Q64578	Sarcoplasmic/endoplasmic reticulum calcium ATPase 1 -ATPase 1) ATPase)	6	34	5	9	-2.10727	0.108465
P26051	CD44 antigen precursor	5	30	3	9	-1.9267	0.942738
P35282	Ras-related protein Rab-21	2	30	1	9	-1.9267	0.942738
O35889	Afadin	5	10	4	9	-0.341737	1
P15207	Androgen receptor	2	10	4	9	-0.341737	1
P61480	WD repeat protein 12	5	10	2	9	-0.341737	1
Q5XI64	Abhydrolase domain-containing protein 6	2	10	2	9	-0.341737	1
Q9D361	U11/U12 snRNP 48 kDa protein	1	10	1	9	-0.341737	1
Q5XI97	Alanyl-tRNA synthetase domain-containing protein 1	3	11	2	9	-0.479241	1
P28023	Dynactin-1	4	11	4	9	-0.479241	1
O88267	Acyl-coenzyme A thioesterase 1	4	11	3	9	-0.479241	1
O54695	Serine palmitoyltransferase 1	3	11	3	9	-0.479241	1
P30412	Peptidyl-prolyl cis-trans isomerase C	1	11	1	9	-0.479241	1
Q9WVJ4	Synaptojanin-2-binding protein	3	11	2	9	-0.479241	1
O35217	Multiple inositol polyphosphate phosphatase 1 precursor -tetrakisphosphate 3-phosphatase) P3-phosphatase)	6	12	3	9	-0.604772	1
Q8BFR4	N-acetylglucosamine-6-sulfatase precursor	2	12	1	9	-0.604772	1
Q8BMA6	Signal recognition particle 68 kDa protein	5	12	4	9	-0.604772	1
Q9JII5	DAZ-associated protein 1	2	14	4	9	-0.827164	1
Q3UMR5	Coiled-coil domain-containing protein 109A	5	15	2	9	-0.9267	1
Q5XIW8	U4/U6U5 tri-snRNP-associated protein 1	6	16	3	9	-1.01981	1
Q9D287	Breast carcinoma amplified sequence 2 homolog	3	17	2	9	-1.10727	1
Q9QZ23	NFU1 iron-sulfur cluster scaffold homolog	3	17	2	9	-1.10727	1
O08734	Bcl-2 homologous antagonist/killer	2	19	1	9	-1.26774	1
Q9Z0Y1	Dynactin subunit 3	1	19	1	9	-1.26774	1
Q8VEE0	Ribulose-phosphate 3-epimerase	1	19	1	9	-1.26774	1
P62320	Small nuclear ribonucleoprotein Sm D3	3	19	3	9	-1.26774	1
Q9EPK7	Exportin-7	4	20	2	9	-1.34174	1
O88480	Calcineurin-binding protein cabin-1	4	22	3	9	-1.47924	1
Q9CYL5	Golgi-associated plant pathogenesis-related protein 1	2	24	4	9	-1.60477	1
Q75WE7	Loss of heterozygosity 11 chromosomal region 2 gene A protein homolog	6	26	4	9	-1.72025	1
Q6P689	Integral membrane protein GPR177 precursor	3	27	1	9	-1.7747	1
Q9JJ28	Protein flightless-1 homolog	9	28	5	9	-1.82716	1
Q8VHU4	Elongator complex protein 1	9	29	6	9	-1.87779	1
P23347	Anion exchange protein 2	0	0	6	10	HG only	1
Q62825	Exocyst complex component 3	0	0	2	10	HG only	1
Q5XIA3	Leucine carboxyl methyltransferase 2	0	0	3	10	HG only	1
Q29RW1	Myosin-4	0	0	5	10	HG only	1
O08892	5-hydroxytryptamine receptor 1B	0	0	1	10	HG only	1
Q8K442	ATP-binding cassette sub-family A member 8-A	0	0	3	10	HG only	1
Q91ZK5	Actin, cytoplasmic 1	0	0	1	10	HG only	1
Q8K3W3	Protein CASC3	0	0	1	10	HG only	1
Q8VC31	Coiled-coil domain-containing protein 9	0	0	4	10	HG only	1
Q3TPX4	Exocyst complex component 5	0	0	1	10	HG only	1
Q8K3E9	Homeobox and leucine zipper protein Homez	0	0	1	10	HG only	1
P43303	Interleukin-1 receptor type 2	0	0	1	10	HG only	1
Q8K215	LYR motif-containing protein 4	0	0	2	10	HG only	1
Q6Y7W8	PERQ amino acid-rich with GYF domain-containing protein 2	0	0	3	10	HG only	1
Q8R0L9	Transcriptional adapter 3-like	0	0	1	10	HG only	1
Q9WU74	Lipolysis-stimulated lipoprotein receptor precursor	5	33	3	10	-1.9122	0.469097
Q63474	Epithelial discoidin domain-containing receptor 1 precursor	10	32	4	10	-1.86781	0.789897
O88778	Protein bassoon	1	1	4	10	3.13219	1
Q6NX65	Programmed cell death protein 10	1	1	2	10	3.13219	1
Q5XHX6	Thioredoxin domain-containing protein 2	1	1	3	10	3.13219	1
Q80XL6	Acyl-CoA dehydrogenase family member 11	1	1	2	10	3.13219	1
O55112	AF4/FMR2 family member 2	1	1	3	10	3.13219	1
P06911	Epididymal retinoic acid-binding protein precursor	1	1	2	10	3.13219	1
P10868	Guanidinoacetate N-methyltransferase	1	1	1	10	3.13219	1
Q60779	Growth-arrest-specific protein 8	1	1	4	10	3.13219	1
P24140	UDP-N-acetylglucosamine--dolichyl-phosphate N-acetylglucosaminephosphotransferase	1	1	1	10	3.13219	1
Q61211	Ligatin	1	1	1	10	3.13219	1
O55126	Protein NipSnap homolog 2	1	1	2	10	3.13219	1
Q4KLH5	Nucleoporin-like protein RIP	1	1	3	10	3.13219	1
Q5RK00	39S ribosomal protein L46, mitochondrial precursor	1	1	2	10	3.13219	1
Q5PQR5	U3 small nucleolar ribonucleoprotein protein IMP4	2	2	3	10	2.13219	1
Q06518	Nitric oxide synthase, inducible	1	2	4	10	2.13219	1
Q9Z1L0	Phosphatidylinositol-4,5-bisphosphate 3-kinase catalytic subunit betaisoform	2	2	4	10	2.13219	1
Q63528	Replication protein A 32 kDa subunit	1	2	1	10	2.13219	1
Q921C5	Protein bicaudal D homolog 2	2	2	2	10	2.13219	1
O88704	Potassium/sodium hyperpolarization-activated cyclic nucleotide-gated channel 1	2	2	1	10	2.13219	1
Q61702	Inter-alpha-trypsin inhibitor heavy chain H1 precursor	1	2	2	10	2.13219	1
Q7TQG1	Pleckstrin homology domain-containing family A member 6	2	2	4	10	2.13219	1
Q810B8	SLIT and NTRK-like protein 4	2	2	1	10	2.13219	1
Q8BZZ3	NEDD4-like E3 ubiquitin-protein ligase WWP1	1	2	4	10	2.13219	1
Q8BYK8	Zinc finger CCCH domain-containing protein 6	2	2	2	10	2.13219	1
O35787	Kinesin-like protein KIF1C	2	3	6	10	1.54723	1
Q80WT5	Aftiphilin	2	3	1	10	1.54723	1
Q9JK38	Glucosamine 6-phosphate N-acetyltransferase	1	3	2	10	1.54723	1
P70248	Unconventional myosin-If	2	3	3	10	1.54723	1
Q08024	Core-binding factor subunit beta	2	3	1	10	1.54723	1
Q9CXG3	Peptidyl-prolyl cis-trans isomerase-like 4	2	4	3	10	1.13219	1
P52020	Squalene monooxygenase	2	5	3	10	0.810266	1
P27615	Lysosome membrane protein 2	2	5	4	10	0.810266	1
Q8BHK1	Non-imprinted in Prader-Willi/Angelman syndrome region protein 1homolog	1	5	1	10	0.810266	1
O88307	Sortilin-related receptor precursor	4	5	4	10	0.810266	1
Q99MB4	COBW domain-containing protein 1	6	6	3	10	0.547231	1
P12346	Serotransferrin precursor	2	6	3	10	0.547231	1
P40201	Chromodomain-helicase-DNA-binding protein 1	4	6	6	10	0.547231	1
Q8K2I9	F-box only protein 18	1	6	1	10	0.547231	1
Q8BRH4	Myeloid/lymphoid or mixed-lineage leukemia protein 3 homolog	2	6	6	10	0.547231	1
Q6AXW4	PHD finger protein 7	2	7	2	10	0.324839	1
Q3ULJ0	Glycerol-3-phosphate dehydrogenase 1-like protein	3	7	3	10	0.324839	1
Q9CYH6	Ribosome biogenesis regulatory protein homolog	2	7	4	10	0.324839	1
Q5BK85	Transmembrane emp24 domain-containing protein 1 precursor	3	7	2	10	0.324839	1
P57097	Proto-oncogene tyrosine-protein kinase MER precursor	2	8	1	10	0.132194	1
P70353	Nuclear transcription factor Y subunit gamma	1	8	1	10	0.132194	1
Q8BLR5	PH and SEC7 domain-containing protein 4	5	8	3	10	0.132194	1
P83565	39S ribosomal protein L40, mitochondrial precursor	1	8	2	10	0.132194	1
Q9D1E6	Tubulin folding cofactor B	2	8	3	10	0.132194	1
Q7TNJ0	Transmembrane 7 superfamily member 4	2	8	1	10	0.132194	1
Q5XI29	Cleavage and polyadenylation specificity factor 7	3	9	1	10	-0.0377311	1
Q8VI02	Serine/threonine-protein phosphatase 4 regulatory subunit 1	3	9	5	10	-0.0377311	1
P70295	Ancient ubiquitous protein 1	2	9	1	10	-0.0377311	1
Q8VBV3	Exosome complex exonuclease RRP4	3	9	2	10	-0.0377311	1
Q9ESN9	C-Jun-amino-terminal kinase-interacting protein 3	4	9	6	10	-0.0377311	1
P30415	NK-tumor recognition protein	2	9	1	10	-0.0377311	1
Q6PGB8	Probable global transcription activator SNF2L1	1	9	2	10	-0.0377311	1
Q8R370	USH1C-binding protein 1	1	9	1	10	-0.0377311	1
O08856	RNA polymerase II elongation factor ELL	3	10	1	10	-0.189734	1
Q9D8T2	Gasdermin domain-containing protein 1	2	10	1	10	-0.189734	1
P70318	Nucleolysin TIAR	1	10	3	10	-0.189734	1
Q5XI81	Fragile X mental retardation syndrome-related protein 1	6	11	3	10	-0.327238	1
Q8CH18	Cell division cycle and apoptosis regulator protein 1	5	11	2	10	-0.327238	1
Q91VW3	SH3 domain-binding glutamic acid-rich-like protein 3	2	11	2	10	-0.327238	1
Q63014	A-kinase anchor protein 8	4	12	4	10	-0.452769	1
P52796	Ephrin-B1 precursor	4	12	4	10	-0.452769	1
O35796	Complement component 1, Q subcomponent-binding protein, mitochondrial precursor	4	12	4	10	-0.452769	1
P06882	Thyroglobulin	3	12	6	10	-0.452769	1
Q62951	Dihydropyrimidinase-related protein 4	3	13	3	10	-0.568246	1
Q9DBS9	Oxysterol-binding protein-related protein 3	3	13	3	10	-0.568246	1
P63100	Calcineurin subunit B isoform 1	3	14	2	10	-0.675161	1
Q69ZL1	FYVE, RhoGEF and PH domain-containing protein 6	5	14	4	10	-0.675161	1
Q64361	Latexin	4	14	3	10	-0.675161	1
Q9Z1K9	Disintegrin and metalloproteinase domain-containing protein 17	3	15	3	10	-0.774697	1
Q9EPC6	Profilin-2	3	15	3	10	-0.774697	1
Q6AYK1	RNA-binding protein with serine-rich domain 1	2	15	4	10	-0.774697	1
Q6EIX2	Mitochondrial import inner membrane translocase subunit TIM16	3	16	1	10	-0.867806	1
P12815	Programmed cell death protein 6	4	17	2	10	-0.955269	1
Q5SUF2	Cisplatin resistance-associated overexpressed protein	4	18	3	10	-1.03773	1
Q9D952	Envoplakin	8	19	6	10	-1.11573	1
Q9CZE3	Ras-related protein Rab-32	3	19	2	10	-1.11573	1
P32362	Uroporphyrinogen decarboxylase	9	20	3	10	-1.18973	1
P20855	Hemoglobin subunit beta	1	20	1	10	-1.18973	1
Q9JKW0	ARL-6-interacting protein 1	1	23	2	10	-1.39137	1
Q9Z0P4	Paralemmin	2	23	2	10	-1.39137	1
Q8CG48	Structural maintenance of chromosomes protein 2	6	23	3	10	-1.39137	1
Q99N87	Mitochondrial 28S ribosomal protein S5	4	26	4	10	-1.56825	1
P97840	Galectin-9	2	27	4	10	-1.62269	1
Q61739	Integrin alpha-6 precursor	8	28	7	10	-1.67516	1
Q6AYA6	Uncharacterized protein C17orf62 homolog	2	29	3	10	-1.72579	1
P47941	Crk-like protein	5	30	2	10	-1.7747	1
Q924S4	Kremen protein 1 precursor	0	0	2	11	HG only	1
Q5I0H9	Protein disulfide-isomerase A5 precursor	0	0	2	11	HG only	1
Q91WF7	SAC domain-containing protein 3	0	0	3	11	HG only	1
P08587	Protein-glutamine gamma-glutamyltransferase 2	0	0	2	11	HG only	1
Q8BXZ1	Protein disulfide-isomerase TXNDC10 precursor	5	37	6	11	-1.93976	0.138667
O35952	Hydroxyacylglutathione hydrolase	1	1	1	11	3.2697	1
Q6E0V2	Katanin p60 ATPase-containing subunit A1	1	1	3	11	3.2697	1
Q9Z269	Vesicle-associated membrane protein-associated protein B	1	1	3	11	3.2697	1
Q6ZQ73	Cullin-associated NEDD8-dissociated protein 2	1	1	1	11	3.2697	1
P97386	DNA ligase 3	1	1	2	11	3.2697	1
Q9Z1P6	NADH-ubiquinone oxidoreductase subunit B145a	1	1	3	11	3.2697	1
O70362	Phosphatidylinositol-glycan-specific phospholipase D	1	1	3	11	3.2697	1
P04774	Sodium channel protein type 1 subunit alpha	1	1	1	11	3.2697	1
P16884	Neurofilament heavy polypeptide	2	2	3	11	2.2697	1
P37230	Peroxisome proliferator-activated receptor alpha	2	2	5	11	2.2697	1
Q8CF97	Deubiquitinating protein VCIP135	2	2	2	11	2.2697	1
Q9D187	Protein FAM96B	2	2	3	11	2.2697	1
Q99LC9	Peroxisome assembly factor 2	2	2	1	11	2.2697	1
P46467	Vacuolar protein sorting-associating protein 4B transport growth defect 1)	1	2	3	11	2.2697	1
O55166	Vacuolar protein sorting-associated protein 52 homolog	1	2	2	11	2.2697	1
Q62871	Dynein intermediate chain 2, cytosolic	2	3	4	11	1.68473	1
Q5U2X2	Sperm-associated antigen 1	3	3	2	11	1.68473	1
Q62753	Syntaxin-binding protein 2	3	3	5	11	1.68473	1
Q99N20	Breast cancer metastasis-suppressor 1 homolog	1	3	1	11	1.68473	1
Q6PGC1	Putative ATP-dependent RNA helicase DHX29	2	3	3	11	1.68473	1
O08776	Uncharacterized protein C3orf60 homolog	1	4	1	11	1.2697	1
Q8R4A3	Dapper homolog 1	3	4	3	11	1.2697	1
Q6V595	Kelch-like protein 6	2	4	2	11	1.2697	1
P19804	Nucleoside diphosphate kinase B	1	4	2	11	1.2697	1
Q6AYK4	Apoptosis facilitator Bcl-2-like protein 14	1	5	2	11	0.947769	1
P01026	Complement C3 precursor	4	5	8	11	0.947769	1
P00173	Cytochrome b5	3	5	5	11	0.947769	1
Q9WVQ1	Atrophin-1-interacting protein 1	1	5	2	11	0.947769	1
A2RT91	Ankyrin and armadillo repeat-containing protein	2	5	2	11	0.947769	1
P61166	UPF0197 protein C11orf10 homolog	2	5	1	11	0.947769	1
O88545	COP9 signalosome complex subunit 6	3	5	5	11	0.947769	1
Q9CRB2	H/ACA ribonucleoprotein complex subunit 2	2	5	1	11	0.947769	1
Q8BH69	Selenide, water dikinase 1	4	5	5	11	0.947769	1
Q62824	Exocyst complex component 4	2	6	3	11	0.684735	1
P55063	Heat shock 70 kDa protein 1L	1	6	1	11	0.684735	1
Q8VI63	Mps one binder kinase activator-like 2	1	6	1	11	0.684735	1
Q923G2	DNA-directed RNA polymerases I, II, and III subunit RPABC3	1	6	1	11	0.684735	1
Q9QZM0	Ubiquilin-2	2	6	2	11	0.684735	1
Q6AXT0	39S ribosomal protein L37, mitochondrial precursor	3	7	3	11	0.462343	1
O54889	DNA-directed RNA polymerase I subunit RPA1	2	7	3	11	0.462343	1
P58028	Amine oxidase B	1	7	2	11	0.462343	1
Q62651	Delta-Delta-dienoyl-CoA isomerase, mitochondrial precursor	1	7	5	11	0.462343	1
O89026	Roundabout homolog 1	1	7	4	11	0.462343	1
Q9D958	Signal peptidase complex subunit 1	1	7	1	11	0.462343	1
P70712	Kynureninase	4	8	3	11	0.269697	1
Q6P752	Torsin-1A-interacting protein 2	3	8	3	11	0.269697	1
P16257	Translocator protein	2	8	3	11	0.269697	1
P14882	Propionyl-CoA carboxylase alpha chain, mitochondrial precursor	4	9	5	11	0.0997725	1
P52873	Pyruvate carboxylase, mitochondrial precursor	5	9	6	11	0.0997725	1
Q8CE93	Protein C6orf78 homolog	1	9	1	11	0.0997725	1
Q04857	Collagen alpha-1 chain	1	9	3	11	0.0997725	1
Q9CPP0	Nucleoplasmin-3	2	9	2	11	0.0997725	1
P62307	Small nuclear ribonucleoprotein F	1	9	2	11	0.0997725	1
P52482	Ubiquitin-conjugating enzyme E2 E1	2	9	3	11	0.0997725	1
Q5HZA9	Transmembrane protein 126A	3	10	3	11	-0.0522306	1
Q8K3H0	DCC-interacting protein 13-alpha	3	11	6	11	-0.189734	1
Q9CR61	NADH dehydrogenase 1 beta subcomplex subunit 7	1	11	1	11	-0.189734	1
Q62773	Sodium/nucleoside cotransporter 2 /nucleoside cotransporter 2)	1	11	2	11	-0.189734	1
O35923	Breast cancer type 2 susceptibility protein homolog	7	12	7	11	-0.315265	1
Q9R0C5	N-acetylgalactosaminyltransferase 7	5	12	4	11	-0.315265	1
O35659	Glucagon-like peptide 1 receptor	1	13	1	11	-0.430742	1
Q99JW4	LIM and senescent cell antigen-like-containing domain protein 1	2	13	2	11	-0.430742	1
Q80SW1	Putative adenosylhomocysteinase 2	3	13	5	11	-0.430742	1
Q6P1I6	PH and SEC7 domain-containing protein 2	9	14	7	11	-0.537657	1
P58681	Toll-like receptor 7	1	14	1	11	-0.537657	1
P63031	Brain protein 44-like protein	4	15	2	11	-0.637193	1
Q8BJY1	26S proteasome non-ATPase regulatory subunit 5	5	15	2	11	-0.637193	1
Q9EPJ3	28S ribosomal protein S26, mitochondrial precursor	3	16	2	11	-0.730303	1
P84586	Heterogeneous nuclear ribonucleoprotein G	7	17	4	11	-0.817765	1
Q5SNZ0	Girdin	1	17	2	11	-0.817765	1
P41516	DNA topoisomerase 2-alpha	6	18	9	11	-0.900228	1
Q9ERA5	Structural maintenance of chromosomes protein 4	6	18	6	11	-0.900228	1
O88777	Presenilin-2	2	19	4	11	-0.97823	1
Q9JI92	Syntenin-1	2	21	2	11	-1.12262	1
Q61817	Cyclic AMP-responsive element-binding protein 3	2	23	1	11	-1.25386	1
P24942	Excitatory amino acid transporter 1	4	23	2	11	-1.25386	1
Q9R190	Metastasis-associated protein MTA2	7	23	7	11	-1.25386	1
Q7TMF3	NADH dehydrogenase 1 alpha subcomplex subunit 12	2	24	2	11	-1.31527	1
Q6P6T5	Occludin	3	26	3	11	-1.43074	1
Q9D173	Probable mitochondrial import receptor subunit TOM7 homolog	1	26	1	11	-1.43074	1
O35777	Implantation-associated protein precursor	8	28	4	11	-1.53766	1
Q8CHY3	Dymeclin	0	0	1	12	HG only	0.82604
Q8BGQ6	Uncharacterized calcium-binding protein KIAA0494	0	0	1	12	HG only	0.82604
Q9DCT2	NADH-ubiquinone oxidoreductase 30 kDa subunit, mitochondrial precursor	0	0	4	12	HG only	0.82604
Q9DC69	NADH dehydrogenase 1 alpha subcomplex subunit 9,mitochondrial precursor	5	40	3	12	-1.9267	0.0695188
P28818	Guanine nucleotide-releasing protein	1	1	3	12	3.39523	1
P21775	3-ketoacyl-CoA thiolase A, peroxisomal precursor	1	1	5	12	3.39523	1
P22325	Alpha-1-antiproteinase S	1	1	1	12	3.39523	1
Q00972	] kinase,mitochondrial precursor	1	1	1	12	3.39523	1
Q8R2K1	Protein fucU homolog	1	1	2	12	3.39523	1
Q9D7M1	Protein C20orf11 homolog	1	1	3	12	3.39523	1
Q9D8Y8	Inhibitor of growth protein 5	1	1	1	12	3.39523	1
Q8CHE4	PH domain leucine-rich repeat-containing protein phosphatase (Suprachiasmatic nucleus circadiancillatory	1	1	2	12	3.39523	1
Q6PDG5	SWI/SNF-related matrix-associated actin-dependent regulator ofchromatin subfamily C member 2	1	1	7	12	3.39523	1
P07872	Acyl-coenzyme A oxidase 1, peroxisomal	2	2	5	12	2.39523	1
P29066	Beta-arrestin-1	2	2	3	12	2.39523	1
Q8C9S4	Protein C10orf118 homolog	1	2	5	12	2.39523	1
O35568	EGF-containing fibulin-like extracellular matrix protein 1 precursor	1	2	1	12	2.39523	1
Q9ERE4	Golgi phosphoprotein 3	3	3	5	12	1.81027	1
Q8BP27	Uncharacterized protein C10orf78 homolog	3	3	2	12	1.81027	1
P56960	Exosome component 10	2	3	3	12	1.81027	1
O35345	Importin subunit alpha-7	1	3	3	12	1.81027	1
O88350	Retinoblastoma-binding protein 9	2	3	3	12	1.81027	1
Q5PQP1	RNA-binding motif, single-stranded-interacting protein 1	2	3	2	12	1.81027	1
P70507	G protein-coupled receptor kinase 4	1	4	3	12	1.39523	1
P97574	Stanniocalcin-1 precursor	1	4	2	12	1.39523	1
Q8CG72	Poly glycohydrolase ARH3	1	4	2	12	1.39523	1
Q06438	Peroxisome biogenesis factor 2	1	4	1	12	1.39523	1
P35822	Receptor-type tyrosine-protein phosphatase kappa precursor	2	4	1	12	1.39523	1
P70122	Shwachman-Bodian-Diamond syndrome protein homolog	1	4	4	12	1.39523	1
Q52KR2	Leucine-rich repeats and immunoglobulin-like domains protein 2	2	5	3	12	1.0733	1
Q9D6J5	NADH dehydrogenase 1 beta subcomplex subunit 8,mitochondrial precursor	1	5	1	12	1.0733	1
Q9CWW6	Peptidyl-prolyl cis-trans isomerase NIMA-interacting 4	2	5	1	12	1.0733	1
Q8R323	Replication factor C subunit 3	1	5	2	12	1.0733	1
P97779	Hyaluronan-mediated motility receptor	3	6	4	12	0.810266	1
Q3SWT4	IWS1 homolog	2	6	2	12	0.810266	1
Q6AY41	Cell cycle control protein 50A	1	6	2	12	0.810266	1
O08597	Gamma-sarcoglycan	1	6	1	12	0.810266	1
Q9Z160	Conserved oligomeric Golgi complex component 1	1	7	2	12	0.587873	1
Q91VC3	Probable ATP-dependent RNA helicase DDX48	3	7	5	12	0.587873	1
Q91VA6	Polymerase delta-interacting protein 2	3	7	2	12	0.587873	1
Q9D7N3	28S ribosomal protein S9, mitochondrial precursor	2	7	1	12	0.587873	1
P24329	Thiosulfate sulfurtransferase	2	7	3	12	0.587873	1
P53563	Apoptosis regulator Bcl-X	1	8	3	12	0.395228	1
Q8CJB9	E3 ubiquitin-protein ligase BRE1B	3	8	5	12	0.395228	1
Q8R4Z9	Mitofusin-1	2	8	4	12	0.395228	1
Q60953	Protein PML	3	8	2	12	0.395228	1
P21126	Ubiquitin-like protein 4A	4	8	2	12	0.395228	1
P50545	Tyrosine-protein kinase HCK	4	9	4	12	0.225303	1
Q8K4Z3	Apolipoprotein A-I-binding protein precursor	2	9	2	12	0.225303	1
Q6P9R1	ATP-dependent RNA helicase DDX51	1	9	3	12	0.225303	1
Q9QZM2	DNA polymerase subunit gamma 2, mitochondrial precursor	1	9	1	12	0.225303	1
Q9QXB9	Developmentally-regulated GTP-binding protein 2	2	9	1	12	0.225303	1
P45479	Palmitoyl-protein thioesterase 1 precursor	1	9	1	12	0.225303	1
Q5EB81	NADH-cytochrome b5 reductase 1	3	10	3	12	0.0733002	1
Q923X9	Trace amine-associated receptor 8a	2	10	3	12	0.0733002	1
Q5M939	Histone acetyltransferase type B catalytic subunit	3	10	2	12	0.0733002	1
Q8CGC6	RNA-binding protein 28	2	10	6	12	0.0733002	1
Q9QXQ0	Alpha-actinin-4	5	11	8	12	-0.0642033	1
Q3B725	Zinc finger and BTB domain-containing protein 24	3	11	3	12	-0.0642033	1
P70288	Histone deacetylase 2	2	11	2	12	-0.0642033	1
Q6ZWM4	U6 snRNA-associated Sm-like protein LSm8	2	11	2	12	-0.0642033	1
Q8C2Q3	RNA-binding protein 14	5	11	2	12	-0.0642033	1
Q8VHS6	Ankyrin repeat and SOCS box protein 15	2	12	4	12	-0.189734	1
P58871	182 kDa tankyrase 1-binding protein	4	12	2	12	-0.189734	1
P70498	Phospholipase D2	2	13	2	12	-0.305211	1
P29418	ATP synthase epsilon chain, mitochondrial	3	14	3	12	-0.412127	1
Q9CQV7	Mitochondrial import inner membrane translocase subunit TIM14	2	15	2	12	-0.511662	1
Q8BTI7	Ankyrin repeat domain-containing protein 52	1	16	1	12	-0.604772	1
Q91YY4	ATP synthase mitochondrial F1 complex assembly factor 2, mitochondrialprecursor	4	16	2	12	-0.604772	1
P11348	Dihydropteridine reductase	4	16	2	12	-0.604772	1
Q08093	Calponin-2	4	17	3	12	-0.692235	1
P63081	Vacuolar ATP synthase 16 kDa proteolipid subunit	3	18	2	12	-0.774697	1
Q8VDL4	ADP-dependent glucokinase	1	18	1	12	-0.774697	1
Q5PPM8	Transmembrane protein 55B	3	18	3	12	-0.774697	1
Q99JH8	ER lumen protein-retaining receptor 1	1	19	1	12	-0.852699	1
Q6P0K8	Junction plakoglobin	4	19	5	12	-0.852699	1
Q9CQH3	NADH dehydrogenase 1 beta subcomplex subunit 5,mitochondrial precursor	1	22	1	12	-1.0642	1
Q6PDK8	Protein deltex-4	1	23	1	12	-1.12833	1
P05508	NADH-ubiquinone oxidoreductase chain 4	3	23	2	12	-1.12833	1
P20689	Myosin light chain kinase 2, skeletal/cardiac muscle	2	24	2	12	-1.18973	1
P25093	Fumarylacetoacetase	5	25	5	12	-1.24863	1
P97546	Neuroplastin precursor	2	25	2	12	-1.24863	1
Q9JLI8	Squamous cell carcinoma antigen recognized by T-cells 3	8	26	5	12	-1.30521	1
P51583	Multifunctional protein ADE2	5	29	5	12	-1.46275	1
Q9JJW6	RNA and export factor-binding protein 2	5	32	2	12	-1.60477	1
Q3TZZ7	Protein FAM62B	11	34	6	12	-1.69223	1
P84903	Stromal interaction molecule 1 precursor	3	34	4	12	-1.69223	1
O35457	C-C chemokine receptor-like 2	0	0	1	13	HG only	0.42455
Q64591	2,4-dienoyl-CoA reductase, mitochondrial precursor	0	0	3	13	HG only	0.42455
Q9D0S9	Histidine triad nucleotide-binding protein 2	0	0	3	13	HG only	0.42455
P20181	Neurotrophin-3 precursor	0	0	1	13	HG only	0.42455
Q99JT2	Serine/threonine-protein kinase MST4	4	39	5	13	-1.7747	0.26699
O08628	Procollagen C-endopeptidase enhancer 1 precursor	1	1	5	13	3.51071	1
Q03114	Cell division protein kinase 5	1	1	2	13	3.51071	1
O35532	C-4 methylsterol oxidase	1	1	2	13	3.51071	1
Q9CR89	Endoplasmic reticulum-Golgi intermediate compartment protein 2	1	1	2	13	3.51071	1
Q62881	Nucleolar protein 3	1	1	3	13	3.51071	1
Q8BWM0	Prostaglandin E synthase 2	1	1	4	13	3.51071	1
Q9R2C1	Ribosome-attached membrane protein 4	1	1	1	13	3.51071	1
Q6NXM2	RCC1 and BTB domain-containing protein 1	1	1	3	13	3.51071	1
Q923J1	Transient receptor potential cation channel subfamily M member 7	1	1	2	13	3.51071	1
P35426	Cell division protein kinase 4	1	2	4	13	2.51071	1
Q922N1	Presequence protease, mitochondrial precursor	1	2	2	13	2.51071	1
Q99N37	Rho GTPase-activating protein 17	1	2	3	13	2.51071	1
Q62671	E3 ubiquitin-protein ligase EDD1	3	3	5	13	1.92574	1
Q9QYL8	Acyl-protein thioesterase 2	1	3	2	13	1.92574	1
Q8CC35	Synaptopodin	1	3	2	13	1.92574	1
Q62774	Myosin-Ia	2	4	5	13	1.51071	1
P18297	Sepiapterin reductase	1	4	4	13	1.51071	1
Q5BJP3	Ubiquitin-fold modifier 1 precursor	1	4	1	13	1.51071	1
Q99068	Alpha-2-macroglobulin receptor-associated protein precursor	4	5	6	13	1.18878	1
Q6AYK5	Cell growth-regulating nucleolar protein	3	5	4	13	1.18878	1
P70550	Ras-related protein Rab-8B	1	5	2	13	1.18878	1
Q8WTY4	Anamorsin	2	5	1	13	1.18878	1
Q9D3G5	Syntaxin-11	1	5	1	13	1.18878	1
Q99MX0	Transketolase-like protein 1	1	5	1	13	1.18878	1
Q8BYB9	KTEL motif-containing protein 1 precursor	3	6	5	13	0.925743	1
P54751	CMP-N-acetylneuraminate-beta-galactosamide-alpha-2,3-sialyltransferase	2	6	2	13	0.925743	1
O88799	Zonadhesin precursor	2	6	4	13	0.925743	1
Q91ZU8	Bullous pemphigoid antigen 1, isoform 5	3	7	4	13	0.703351	1
Q61330	Contactin-2 precursor	2	7	3	13	0.703351	1
Q5BKC6	HSPB1-associated protein 1	2	7	3	13	0.703351	1
O88491	Histone-lysine N-methyltransferase, H3 lysine-36 and H4 lysine-20specific	5	7	7	13	0.703351	1
Q9CT10	Ran-binding protein 3	2	7	2	13	0.703351	1
Q62241	U1 small nuclear ribonucleoprotein C	1	7	2	13	0.703351	1
Q8BIJ6	Isoleucyl-tRNA synthetase, mitochondrial precursor	2	7	6	13	0.703351	1
Q62632	Follistatin-related protein 1 precursor	3	8	1	13	0.510706	1
Q91Z96	BMP-2-inducible protein kinase	3	8	1	13	0.510706	1
Q9D2R1	Mitochondrial Rho GTPase 1	1	8	4	13	0.510706	1
Q9WTZ8	Protein BEX2	1	9	1	13	0.340781	1
Q8BJF9	Charged multivesicular body protein 2b	2	9	4	13	0.340781	1
P60905	DnaJ homolog subfamily C member 5	5	9	3	13	0.340781	1
Q9JHW9	Aldehyde dehydrogenase family 1 member A3	2	10	1	13	0.188777	1
P25977	Nucleolar transcription factor 1	2	11	5	13	0.0512739	1
Q9QZR8	PDZ domain-containing protein 3	3	11	2	13	0.0512739	1
Q9Z2Q7	Syntaxin-8	3	12	3	13	-0.0742569	1
Q64541	Sodium/potassium-transporting ATPase subunit alpha-4 /K ATPase alpha-4 subunit)	3	12	3	13	-0.0742569	1
Q62523	Zyxin	6	12	3	13	-0.0742569	1
P51611	Host cell factor	4	13	4	13	-0.189734	1
P13439	Uridine 5'-monophosphate synthase	3	13	4	13	-0.189734	1
Q9JLT6	BH3-interacting domain death agonist	3	14	2	13	-0.296649	1
Q5BJX1	39S ribosomal protein L41, mitochondrial precursor	3	14	4	13	-0.296649	1
P08081	Clathrin light chain A	3	15	3	13	-0.396185	1
P97526	Neurofibromin	5	15	5	13	-0.396185	1
P11531	Dystrophin	4	15	8	13	-0.396185	1
Q6PB93	Polypeptide N-acetylgalactosaminyltransferase 2	4	15	3	13	-0.396185	1
Q5BK20	Hematological and neurological expressed 1-like protein	3	16	3	13	-0.489294	1
Q5M819	Phosphoserine phosphatase	4	16	2	13	-0.489294	1
P70705	Copper-transporting ATPase 1	7	17	3	13	-0.576757	1
Q8K389	CDK5 regulatory subunit-associated protein 2	4	18	5	13	-0.659219	1
Q8BFR6	AN1-type zinc finger protein 1	2	18	2	13	-0.659219	1
Q8BIQ5	Cleavage stimulation factor 64 kDa subunit	6	19	4	13	-0.737222	1
Q5I0K8	28S ribosomal protein S7, mitochondrial precursor	3	22	3	13	-0.948726	1
Q9R0T3	DnaJ homolog subfamily C member 3	5	23	7	13	-1.01286	1
Q99N27	Sorting nexin-1	7	23	5	13	-1.01286	1
Q9WTK3	Glycosylphosphatidylinositol anchor attachment 1 protein	4	25	4	13	-1.13315	1
P70619	Glutathione reductase	9	34	4	13	-1.57676	1
Q9CPQ1	Cytochrome c oxidase subunit 6C	0	0	3	14	HG only	0.218737
P49020	Transmembrane emp24 domain-containing protein 2	0	0	4	14	HG only	0.218737
P79457	Histone demethylase UTY	0	0	1	14	HG only	0.218737
Q9Z1Z9	PDZ and LIM domain protein 7	8	43	6	14	-1.80864	0.0807093
O35331	Pyridoxal kinase	2	38	3	14	-1.63031	0.928223
P07323	Gamma-enolase	1	1	5	14	3.61762	1
Q60560	DNA-binding protein SMUBP-2	1	1	2	14	3.61762	1
P38552	Galectin-4	1	2	2	14	2.61762	1
Q9DBF7	Coiled-coil domain-containing protein 49	1	2	1	14	2.61762	1
Q3TRM4	Neuropathy target esterase	1	2	2	14	2.61762	1
Q8VBT2	L-serine dehydratase/L-threonine deaminase	1	2	1	14	2.61762	1
P41682	Alcohol dehydrogenase class 4 mu/sigma chain	2	3	5	14	2.03266	1
Q62192	CD180 antigen precursor	1	3	2	14	2.03266	1
Q5PPJ4	Deoxyhypusine hydroxylase	2	3	2	14	2.03266	1
O89019	Inversin	2	3	6	14	2.03266	1
Q9D8Z1	Activating signal cointegrator 1 complex subunit 1	2	4	3	14	1.61762	1
P80431	Cytochrome c oxidase polypeptide VIIb, mitochondrial precursor	1	4	1	14	1.61762	1
Q9DAW6	U4/U6 small nuclear ribonucleoprotein Prp4	2	4	6	14	1.61762	1
O70493	Sorting nexin-12	2	4	2	14	1.61762	1
P83829	Intraflagellar transport protein 81 homolog	4	5	2	14	1.29569	1
Q63272	Tyrosine-protein kinase JAK3	4	5	4	14	1.29569	1
P61212	ADP-ribosylation factor-like protein 1	1	5	2	14	1.29569	1
Q99MQ4	Asporin	1	5	1	14	1.29569	1
P63242	Eukaryotic translation initiation factor 5A	3	5	6	14	1.29569	1
Q9QXA5	U6 snRNA-associated Sm-like protein LSm4	1	5	2	14	1.29569	1
Q920F6	Structural maintenance of chromosomes 1-like 2 protein	5	5	4	14	1.29569	1
O08759	Ubiquitin-protein ligase E3A	3	5	4	14	1.29569	1
O70352	CD82 antigen	3	6	3	14	1.03266	1
P29117	Peptidyl-prolyl cis-trans isomerase, mitochondrial precursor	1	6	3	14	1.03266	1
P55200	Zinc finger protein HRX	6	6	6	14	1.03266	1
Q6DVA0	LEM domain-containing protein 2	2	6	2	14	1.03266	1
Q64151	Semaphorin-4C	1	6	1	14	1.03266	1
O55164	Multiple PDZ domain protein	3	7	7	14	0.810266	1
P33273	Cytochrome P450 2C24	1	9	1	14	0.447696	1
Q8BRM2	N-terminal kinase-like-binding protein 1	1	9	2	14	0.447696	1
Q9CQE7	Serologically defined breast cancer antigen NY-BR-84 homolog	4	9	3	14	0.447696	1
Q64620	Serine/threonine-protein phosphatase 6	4	10	3	14	0.295693	1
Q6AYA1	H/ACA ribonucleoprotein complex subunit 1	3	10	4	14	0.295693	1
Q99KH8	Serine/threonine-protein kinase 24	2	10	3	14	0.295693	1
Q8BPG6	Sulfatase-modifying factor 2	3	11	2	14	0.158189	1
Q9Z1I6	Rho guanine nucleotide exchange factor 1	4	12	4	14	0.0326583	1
Q9EQP2	EH domain-containing protein 4	4	12	3	14	0.0326583	1
O08623	Sequestosome-1	4	13	2	14	-0.082819	1
Q8CFI7	DNA-directed RNA polymerase II subunit RPB2	5	13	4	14	-0.082819	1
O54694	Serine palmitoyltransferase 2	3	14	3	14	-0.189734	1
P23800	Regulator of chromosome condensation	3	14	2	14	-0.189734	1
Q8C0E2	Vacuolar protein sorting-associated protein 26B	3	14	3	14	-0.189734	1
Q9D2J7	Ankyrin repeat domain-containing protein 5	1	15	2	14	-0.28927	1
P18608	Nonhistone chromosomal protein HMG-14	2	15	4	14	-0.28927	1
Q60870	Receptor expression-enhancing protein 5	3	16	2	14	-0.382379	1
Q9ES54	Nuclear protein localization protein 4 homolog	2	17	7	14	-0.469842	1
Q9JLV1	BAG family molecular chaperone regulator 3	4	17	2	14	-0.469842	1
Q9D883	Splicing factor U2AF 35 kDa subunit	3	17	3	14	-0.469842	1
P31230	Multisynthetase complex auxiliary component p43	4	18	2	14	-0.552304	1
Q9WUF4	Vesicle-associated membrane protein 8	5	21	5	14	-0.774697	1
P25286	Vacuolar proton translocating ATPase 116 kDa subunit a isoform 1	9	21	7	14	-0.774697	1
Q80YA8	Crumbs homolog 2	4	22	1	14	-0.841811	1
Q5U318	Astrocytic phosphoprotein PEA-15	5	24	3	14	-0.967342	1
Q99MZ8	LIM and SH3 domain protein 1	9	25	6	14	-1.02624	1
P37805	Transgelin-3	2	26	3	14	-1.08282	1
Q6NVG1	1-acyl-sn-glycerol-3-phosphate acyltransferase eta	3	26	3	14	-1.08282	1
Q9CZX9	Transmembrane protein 85	5	28	2	14	-1.18973	1
Q9ERK4	Importin-alpha re-exporter	6	29	7	14	-1.24036	1
Q8BML1	Protein MICAL-2	10	35	6	14	-1.51166	1
Q63514	C4b-binding protein alpha chain precursor	0	0	2	15	HG only	0.11294
P34058	Heat shock protein HSP 90-beta	0	0	5	15	HG only	0.11294
Q9WTL4	Insulin receptor-related protein precursor	0	0	1	15	HG only	0.11294
Q9Z313	60S ribosomal protein L13	0	0	4	15	HG only	0.11294
Q8BFQ4	WD repeat protein 82	1	1	2	15	3.71716	1
Q71UE8	NEDD8 precursor	2	2	4	15	2.71716	1
Q03173	Protein enabled homolog	1	2	3	15	2.71716	1
Q8CHH9	Septin-8	1	2	2	15	2.71716	1
P48787	Troponin I, cardiac muscle	1	2	1	15	2.71716	1
Q9QZH2	BRCA1-associated RING domain protein 1	1	3	4	15	2.13219	1
Q61103	Zinc finger protein ubi-d4	1	3	5	15	2.13219	1
Q80X41	Serine/threonine-protein kinase VRK1	2	3	2	15	2.13219	1
Q792G6	Neuroendocrine secretory protein 55	1	4	2	15	1.71716	1
Q6PAL8	Rab6-interacting protein 1	3	4	2	15	1.71716	1
Q80X82	Symplekin	2	4	3	15	1.71716	1
O35738	Krueppel-like factor 12	1	5	1	15	1.39523	1
Q91WE2	NEFA-interacting nuclear protein NIP30	2	5	4	15	1.39523	1
Q5RJT2	Putative rRNA methyltransferase 3 -methyltransferase 3)	5	6	5	15	1.13219	1
P97839	Disks large-associated protein 4	2	6	4	15	1.13219	1
Q9QYJ3	DnaJ homolog subfamily B member 1	2	6	4	15	1.13219	1
Q9D7X3	Dual specificity protein phosphatase 3	2	6	2	15	1.13219	1
Q9ERR8	Zinc finger protein 319	1	6	2	15	1.13219	1
P10536	Ras-related protein Rab-1B	1	7	2	15	0.909802	1
P61250	Retinal cone rhodopsin-sensitive cGMP 3',5'-cyclic phosphodiesterasesubunit gamma	1	7	1	15	0.909802	1
Q810F1	Choline transporter-like protein 2	2	7	1	15	0.909802	1
O88958	Glucosamine-6-phosphate isomerase	3	7	2	15	0.909802	1
Q9CQ69	Ubiquinol-cytochrome c reductase complex ubiquinone-binding proteinQP-C	1	7	2	15	0.909802	1
Q6ZQL4	WD repeat-containing protein 43	2	7	5	15	0.909802	1
P47858	6-phosphofructokinase, muscle type	5	8	4	15	0.717156	1
P20611	Lysosomal acid phosphatase precursor	3	8	3	15	0.717156	1
Q03410	Synaptonemal complex protein 1	9	9	8	15	0.547231	1
Q7TSA0	Mitochondrial Rho GTPase 2	3	9	5	15	0.547231	1
P22062	Protein-L-isoaspartate O-methyltransferase	2	10	4	15	0.395228	1
Q8VE37	Regulator of chromosome condensation	1	10	1	15	0.395228	1
Q9WVL3	Solute carrier family 12 member 7	5	10	4	15	0.395228	1
Q9JHY8	DNA ligase 1	4	11	3	15	0.257725	1
P37285	Kinesin light chain 1	3	11	4	15	0.257725	1
O55171	Acyl-coenzyme A thioesterase 2, mitochondrial precursor	1	11	4	15	0.257725	1
Q8BYK6	YTH domain family protein 3	2	11	3	15	0.257725	1
Q8BMN3	Neuronal acetylcholine receptor subunit beta-3 precursor	3	12	1	15	0.132194	1
Q9Z277	Bromodomain adjacent to zinc finger domain protein 1B	5	12	5	15	0.132194	1
Q63690	Apoptosis regulator BAX, membrane isoform alpha	3	13	4	15	0.0167167	1
Q62384	Zinc finger protein ZPR1	2	13	2	15	0.0167167	1
Q6MG49	Large proline-rich protein BAT3	4	14	7	15	-0.0901985	1
P20673	Argininosuccinate lyase	5	15	7	15	-0.189734	1
Q8VDM6	Heterogeneous nuclear ribonucleoprotein U-like protein 1	5	15	4	15	-0.189734	1
P56558	UDP-N-acetylglucosamine--peptide N-acetylglucosaminyltransferase 110kDa subunit	1	16	3	15	-0.282844	1
Q8R2I0	Forkhead box protein E1	1	16	2	15	-0.282844	1
Q3UMB9	Uncharacterized protein KIAA1033	2	16	3	15	-0.282844	1
Q9R0A0	Peroxisomal membrane protein PEX14	3	16	5	15	-0.282844	1
Q8R5H1	Ubiquitin carboxyl-terminal hydrolase 15	10	16	3	15	-0.282844	1
Q63425	Periaxin	4	17	9	15	-0.370306	1
Q5XIU5	Proteasome inhibitor PI31 subunit	3	17	4	15	-0.370306	1
P13634	Carbonic anhydrase 1	2	17	2	15	-0.370306	1
P62311	U6 snRNA-associated Sm-like protein LSm3	2	17	3	15	-0.370306	1
O35854	Branched-chain-amino-acid aminotransferase, mitochondrial precursor )	3	18	5	15	-0.452769	1
Q3B7T9	Rab11 family-interacting protein 1	3	18	5	15	-0.452769	1
P42567	Epidermal growth factor receptor substrate 15	3	18	2	15	-0.452769	1
O35083	1-acyl-sn-glycerol-3-phosphate acyltransferase alpha	2	19	2	15	-0.530771	1
O35609	Secretory carrier-associated membrane protein 3	1	19	1	15	-0.530771	1
Q64633	UDP-glucuronosyltransferase 1-7 precursor	5	19	3	15	-0.530771	1
P83883	60S ribosomal protein L36a	2	20	3	15	-0.604772	1
Q8BV13	COP9 signalosome complex subunit 7b	3	21	3	15	-0.675161	1
Q9JLV5	Cullin-3	5	21	6	15	-0.675161	1
Q9R1D7	Golgi-specific brefeldin A-resistance guanine nucleotide exchangefactor 1	3	21	2	15	-0.675161	1
Q6AXN3	Transmembrane emp24 domain-containing protein 5 precursor	3	24	3	15	-0.867806	1
Q9R233	Tapasin precursor	1	24	1	15	-0.867806	1
Q4V7F2	Cysteine-rich with EGF-like domain protein 1 precursor	5	28	3	15	-1.0902	1
Q9WVD5	Mitochondrial ornithine transporter 1	2	28	2	15	-1.0902	1
P97515	Alpha-2-HS-glycoprotein	2	29	2	15	-1.14082	1
Q765A7	GPI inositol-deacylase	4	29	2	15	-1.14082	1
Q3TDQ1	Dolichyl-diphosphooligosaccharide--protein glycosyltransferase subunitSTT3B	3	32	3	15	-1.28284	1
Q8BGQ7	Alanyl-tRNA synthetase	13	32	9	15	-1.28284	1
Q02589	hydrolase	0	0	3	16	HG only	0.0584233
Q8K3X8	Heat shock factor-binding protein 1	0	0	3	16	HG only	0.0584233
Q9R1M5	NACHT, LRR and PYD domains-containing protein 5	0	0	5	16	HG only	0.0584233
Q9R0P6	Microsomal signal peptidase 18 kDa subunit	0	0	3	16	HG only	0.0584233
Q99372	Elastin precursor	7	45	7	16	-1.68159	0.142947
P17078	60S ribosomal protein L35	3	45	4	16	-1.68159	0.142947
Q9JHX2	Transcription factor Sp5	1	1	2	16	3.81027	1
Q99P63	EF-hand domain-containing family member A1	2	2	3	16	2.81027	1
O35343	Importin subunit alpha-4	1	2	4	16	2.81027	1
Q8CIV7	Transcription factor Ovo-like 2	1	2	2	16	2.81027	1
O54820	Bifunctional 3'-phosphoadenosine 5'-phosphosulfate synthetase 1	2	2	4	16	2.81027	1
Q4V8C2	Centromere/kinetochore protein zw10 homolog	2	3	6	16	2.2253	1
P43404	Tyrosine-protein kinase ZAP-70	1	4	2	16	1.81027	1
Q8BWR2	UPF0424 protein C1orf128 homolog	1	6	1	16	1.2253	1
Q810A7	ATP-dependent RNA helicase DDX42	3	6	6	16	1.2253	1
P43352	DNA repair protein RAD52 homolog	2	6	3	16	1.2253	1
P62944	AP-2 complex subunit beta-1	3	7	4	16	1.00291	1
Q921N6	Probable ATP-dependent RNA helicase DDX27	4	8	4	16	0.810266	1
P09215	Protein kinase C delta type	3	8	4	16	0.810266	1
Q9QX47	SON protein	4	8	7	16	0.810266	1
Q9DBE8	Alpha-1,3-mannosyltransferase ALG2 GlcNAc-PP-dolichol mannosyltransferase)	3	9	4	16	0.640341	1
P70298	Homeobox protein cut-like 2	2	9	2	16	0.640341	1
O35986	Zinc finger Ran-binding domain-containing protein 2	4	9	5	16	0.640341	1
Q64559	Cytosolic acyl coenzyme A thioester hydrolase	5	10	4	16	0.488338	1
Q63862	Myosin-11	5	10	6	16	0.488338	1
P19836	Choline-phosphate cytidylyltransferase A	3	10	2	16	0.488338	1
P63312	Thymosin beta-10	3	10	5	16	0.488338	1
Q8BKZ9	Pyruvate dehydrogenase protein X component, mitochondrial precursor	4	10	4	16	0.488338	1
Q9ET01	Glycogen phosphorylase, liver form	2	10	3	16	0.488338	1
P56376	Acylphosphatase-1	1	11	1	16	0.350834	1
A2BDX3	Molybdenum cofactor synthesis protein 3	2	11	1	16	0.350834	1
A1L108	Actin-related protein 2/3 complex subunit 5-like protein	2	12	4	16	0.225303	1
P63045	Vesicle-associated membrane protein 2	3	12	3	16	0.225303	1
Q9Z1T1	AP-3 complex subunit beta-1	6	14	3	16	0.00291092	1
Q922K7	Putative RNA methyltransferase NOL1	4	15	2	16	-0.0966248	1
Q9QZ86	Nucleolar protein NOP5	7	15	5	16	-0.0966248	1
Q91ZR2	Sorting nexin-18	3	15	4	16	-0.0966248	1
P31232	Transgelin	4	16	3	16	-0.189734	1
Q62167	ATP-dependent RNA helicase DDX3X	5	16	4	16	-0.189734	1
P58742	Aladin	4	17	2	16	-0.277197	1
P50096	Inosine-5'-monophosphate dehydrogenase 1	4	17	3	16	-0.277197	1
Q99J36	THUMP domain-containing protein 1	3	17	3	16	-0.277197	1
P36372	Antigen peptide transporter 2	4	19	3	16	-0.437662	1
Q9D666	Sad1/unc-84 protein-like 1	6	20	4	16	-0.511662	1
Q5XI01	La-related protein 7	7	22	5	16	-0.649166	1
P70470	Acyl-protein thioesterase 1	7	23	4	16	-0.713296	1
P63074	Eukaryotic translation initiation factor 4E	4	24	4	16	-0.774697	1
Q704E8	ATP-binding cassette sub-family B member 7, mitochondrial	8	24	3	16	-0.774697	1
P36876	Serine/threonine-protein phosphatase 2A 55 kDa regulatory subunit Balpha isoform	7	25	6	16	-0.83359	1
Q6IG01	Keratin, type II cytoskeletal 1b	5	27	5	16	-0.944622	1
Q9JJW3	Up-regulated during skeletal muscle growth protein 5	1	27	1	16	-0.944622	1
O35276	Neuropilin-2 precursor	8	32	4	16	-1.18973	1
P54116	Erythrocyte band 7 integral membrane protein	5	34	5	16	-1.2772	1
Q62894	Extracellular matrix protein 1 precursor	1	1	3	17	3.89773	0.786127
Q8BGE5	Fanconi anemia group M protein homolog	1	1	5	17	3.89773	0.786127
Q923W4	Hepatoma-derived growth factor-related protein 3	1	1	3	17	3.89773	0.786127
Q9JK72	Copper chaperone for superoxide dismutase	2	2	3	17	2.89773	1
Q8R0H9	ADP-ribosylation factor-binding protein GGA1	1	3	3	17	2.31277	1
Q9QUR2	Dynactin subunit 4	4	5	3	17	1.5758	1
Q9CQ54	NADH dehydrogenase 1 subunit C2	2	5	3	17	1.5758	1
Q99P67	Sclerostin precursor	1	5	1	17	1.5758	1
Q6PD03	Serine/threonine-protein phosphatase 2A 56 kDa regulatory subunitalpha isoform	2	6	4	17	1.31277	1
O35368	Interferon-activable protein 203	3	6	4	17	1.31277	1
P97927	Laminin subunit alpha-4	1	6	2	17	1.31277	1
P54729	NEDD8 ultimate buster 1	3	6	4	17	1.31277	1
Q6PR54	Telomere-associated protein RIF1	3	6	5	17	1.31277	1
Q99ND9	RWD domain-containing protein 1	2	7	2	17	1.09037	1
Q99J45	Nuclear receptor-binding protein	3	7	4	17	1.09037	1
Q99P77	Nucleolar GTP-binding protein 1	4	8	10	17	0.897729	1
O88902	Tyrosine-protein phosphatase non-receptor type 23	4	8	7	17	0.897729	1
P59383	Uncharacterized protein C20orf75 homolog precursor	2	8	1	17	0.897729	1
Q60592	Microtubule-associated serine/threonine-protein kinase 2	2	8	3	17	0.897729	1
Q91X25	Ubiquitin carboxyl-terminal hydrolase 47	3	8	6	17	0.897729	1
P18163	Long-chain-fatty-acid--CoA ligase 1	4	10	4	17	0.575801	1
Q61136	Serine/threonine-protein kinase PRP4 homolog	3	10	3	17	0.575801	1
P15800	Laminin subunit beta-2 precursor	5	11	7	17	0.438297	1
P35433	Amidophosphoribosyltransferase precursor	3	11	3	17	0.438297	1
Q7TNF8	Peripheral-type benzodiazepine receptor-associated protein 1	2	12	2	17	0.312766	1
Q62760	Mitochondrial import receptor subunit TOM20 homolog	5	13	2	17	0.197289	1
Q62780	Probable ATP-dependent RNA helicase DDX46	9	14	9	17	0.0903738	1
Q99ML2	Non-receptor tyrosine-protein kinase TNK1	2	14	2	17	0.0903738	1
P41542	General vesicular transport factor p115	6	15	6	17	-0.00916192	1
Q3KNM2	E3 ubiquitin-protein ligase MARCH5	2	15	2	17	-0.00916192	1
P05942	Protein S100-A4	4	15	2	17	-0.00916192	1
P70478	Adenomatous polyposis coli protein	3	16	6	17	-0.102271	1
P70617	Ninjurin-1	3	16	2	17	-0.102271	1
Q80VY9	Putative ATP-dependent RNA helicase DHX33	1	18	1	17	-0.272196	1
Q66H98	Serum deprivation-response protein	4	18	5	17	-0.272196	1
P50442	Glycine amidinotransferase, mitochondrial precursor	3	19	2	17	-0.350199	1
P49962	Signal recognition particle 9 kDa protein	4	20	2	17	-0.424199	1
Q9ESJ1	CDK5 and ABL1 enzyme substrate 1	2	21	1	17	-0.494589	1
Q8K3X2	GDP-L-fucose synthetase -binding protein)	2	21	3	17	-0.494589	1
Q9QZ88	Vacuolar protein sorting-associated protein 29	3	21	3	17	-0.494589	1
P84245	Histone H33	2	22	2	17	-0.561703	1
Q8BJS4	Sad1/unc-84-like protein 2	4	22	5	17	-0.561703	1
P07742	Ribonucleoside-diphosphate reductase large subunit	6	23	3	17	-0.625833	1
P25304	Agrin precursor	6	27	5	17	-0.857159	1
P39951	Cell division control protein 2 homolog	8	30	3	17	-1.00916	1
P67874	Casein kinase II subunit beta	5	31	4	17	-1.05647	1
P70500	CDP-diacylglycerol--inositol 3-phosphatidyltransferase	4	36	2	17	-1.2722	1
Q8VHV8	Selenoprotein S	6	37	4	17	-1.31172	1
Q8R087	Beta-1,4-galactosyltransferase 7	1	1	1	18	3.98019	0.428525
P14650	Thyroid peroxidase	1	2	3	18	2.98019	1
P17164	Tissue alpha-L-fucosidase	1	2	2	18	2.98019	1
P50411	Protein phosphatase inhibitor 2	1	2	1	18	2.98019	1
P41230	Jumonji/ARID domain-containing protein 1C	2	2	3	18	2.98019	1
P19426	Negative elongation factor E	1	2	5	18	2.98019	1
Q6AYB5	Signal recognition particle 54 kDa protein	3	3	4	18	2.39523	1
Q7TT49	Serine/threonine-protein kinase MRCK beta	4	4	4	18	1.98019	1
Q8CCS6	Polyadenylate-binding protein 2 -binding protein 2) -binding protein II) -binding protein 1)	2	4	7	18	1.98019	1
Q9QXQ1	cAMP-specific 3',5'-cyclic phosphodiesterase 7B	1	4	1	18	1.98019	1
Q5M827	Pirin	2	5	4	18	1.65826	1
Q8CG16	Complement C1r-A subcomponent	1	5	1	18	1.65826	1
Q8K5B3	Multiple coagulation factor deficiency protein 2 homolog precursor	2	5	3	18	1.65826	1
Q62245	Son of sevenless homolog 1	1	6	4	18	1.39523	1
Q9R269	Periplakin	4	7	7	18	1.17284	1
Q9JJ80	Brix domain-containing protein 1	3	8	6	18	0.980191	1
Q812D3	Peptidyl-prolyl cis-trans isomerase-like 3	6	10	3	18	0.658263	1
Q9Z2A5	Arginyl-tRNA--protein transferase 1	2	10	3	18	0.658263	1
Q5FWT1	Protein FAM98A	4	11	2	18	0.520759	1
Q9Z1K5	Protein ariadne-1 homolog	2	11	3	18	0.520759	1
Q8CI95	Oxysterol-binding protein-related protein 11	1	11	1	18	0.520759	1
Q5XIG6	N-acetylgalactosamine kinase	3	12	4	18	0.395228	1
P11688	Integrin alpha-5 precursor	3	12	3	18	0.395228	1
Q9CSN1	SNW domain-containing protein 1	5	14	7	18	0.172836	1
P62317	Small nuclear ribonucleoprotein Sm D2	6	15	3	18	0.0733002	1
Q8VII6	Choline transporter-like protein 1	3	16	2	18	-0.0198092	1
P62982	40S ribosomal protein S27a	3	17	3	18	-0.107272	1
Q8BTI8	Serine/arginine repetitive matrix protein 2	7	17	4	18	-0.107272	1
Q8K3J1	NADH-ubiquinone oxidoreductase 23 kDa subunit, mitochondrial precursor	2	18	4	18	-0.189734	1
Q9JJU8	SH3 domain-binding glutamic acid-rich-like protein	3	18	3	18	-0.189734	1
P59529	Taste receptor type 2 member 16	1	18	1	18	-0.189734	1
Q8BXV2	BRI3-binding protein	3	19	2	18	-0.267737	1
Q61733	28S ribosomal protein S31, mitochondrial precursor	2	25	2	18	-0.663665	1
Q61043	Ninein	8	26	5	18	-0.720249	1
Q62724	DNA replication licensing factor MCM6	5	30	5	18	-0.9267	1
Q505J9	ATPase family AAA domain-containing protein 1	6	33	4	18	-1.0642	1
P11951	Cytochrome c oxidase polypeptide VIc-2	3	34	5	18	-1.10727	1
P55012	Solute carrier family 12 member 2	9	38	4	18	-1.26774	1
Q5BJK8	Golgi phosphoprotein 4	5	41	5	18	-1.37736	1
Q6IUR5	Neudesin precursor	1	1	3	19	4.05819	0.233351
Q6AY86	Vacuolar protein sorting-associated protein 26A	1	4	3	19	2.05819	1
Q9Z238	G1/S-specific cyclin-E2	1	5	2	19	1.73627	1
P51111	Huntingtin	3	6	3	19	1.47323	1
Q80Z70	Sel-1 homolog precursor	5	8	5	19	1.05819	1
P18437	Nonhistone chromosomal protein HMG-17	2	10	5	19	0.736265	1
Q9R1K6	Probable G-protein coupled receptor 34	1	11	2	19	0.598762	1
Q91ZW1	Transcription factor A, mitochondrial precursor	5	12	7	19	0.473231	1
Q91ZW3	SWI/SNF-related matrix-associated actin-dependent regulator of chromatin subfamily A member 5	6	12	7	19	0.473231	1
Q562B5	Phosphoglycerate mutase family member 5 precursor	3	14	3	19	0.250838	1
Q10739	Matrix metalloproteinase-14 precursor	5	15	7	19	0.151303	1
Q08850	Syntaxin-4	5	15	5	19	0.151303	1
Q63750	Mitochondrial 39S ribosomal protein L23	4	15	4	19	0.151303	1
Q61235	Beta-2-syntrophin	2	17	2	19	-0.0292695	1
Q9CZU3	Superkiller viralicidic activity 2-like 2	5	18	4	19	-0.111732	1
Q91W67	Ubiquitin-like protein 7	1	19	1	19	-0.189734	1
Q91V33	KH domain-containing, RNA-binding, signal transduction-associatedprotein 1	5	20	4	19	-0.263735	1
Q498E0	Thioredoxin domain-containing protein 12 precursor	2	20	3	19	-0.263735	1
P15307	Proto-oncogene c-Rel	2	22	1	19	-0.401238	1
Q8BI84	Melanoma inhibitory activity protein 3 precursor	5	24	5	19	-0.526769	1
P50547	CTP synthase 1	5	24	3	19	-0.526769	1
P58389	Serine/threonine-protein phosphatase 2A regulatory subunit B'	6	28	3	19	-0.749162	1
Q7TQ95	Protein lunapark	3	29	5	19	-0.799788	1
P48975	Actin, cytoplasmic 1	5	36	3	19	-1.11173	1
P11250	60S ribosomal protein L34	5	43	2	19	-1.36807	1
O70503	Putative steroid dehydrogenase KIK-I	7	52	4	20	-1.56825	0.0932823
O70377	Synaptosomal-associated protein 23	4	48	8	20	-1.45277	0.556504
Q3ZAV8	Enhancer of mRNA-decapping protein 4	1	2	8	20	3.13219	0.961699
Q9QZM3	Cardiotrophin-like cytokine factor 1 precursor	1	3	1	20	2.54723	1
O70318	Band 41-like protein 2	4	4	4	20	2.13219	1
Q5M9F8	N-terminal kinase-like protein	3	6	3	20	1.54723	1
Q8VHE6	Ciliary dynein heavy chain 5	6	8	4	20	1.13219	1
P59114	Phosphorylated CTD-interacting factor 1	1	8	1	20	1.13219	1
P20069	Mitochondrial-processing peptidase alpha subunit, mitochondrialprecursor	3	9	6	20	0.962269	1
O35156	UTP--glucose-1-phosphate uridylyltransferase	4	9	2	20	0.962269	1
Q7TP40	PEST proteolytic signal-containing nuclear protein	3	10	4	20	0.810266	1
Q8VEJ4	Notchless protein homolog 1	1	10	3	20	0.810266	1
Q8CCF0	U4/U6 small nuclear ribonucleoprotein Prp31	3	10	5	20	0.810266	1
Q71TY3	40S ribosomal protein S27	1	10	2	20	0.810266	1
P97519	Hydroxymethylglutaryl-CoA lyase, mitochondrial precursor	1	12	5	20	0.547231	1
Q9ESZ0	DNA repair protein XRCC1	3	12	4	20	0.547231	1
O89042	DNA polymerase alpha catalytic subunit	6	13	6	20	0.431754	1
P23780	Beta-galactosidase precursor	3	13	5	20	0.431754	1
Q6IMX7	Hsp70-binding protein 1	4	13	2	20	0.431754	1
Q5QNQ6	Oxysterol-binding protein 2	3	13	2	20	0.431754	1
Q9CYR6	Phosphoacetylglucosamine mutase	5	15	4	20	0.225303	1
Q9DC69	NADH-ubiquinone oxidoreductase 39 kDa subunit, mitochondrial precursor	3	15	4	20	0.225303	1
P70206	Plexin-A1 precursor	6	15	5	20	0.225303	1
Q8BXK9	Chloride intracellular channel protein 5	2	16	2	20	0.132194	1
Q8K299	Scavenger receptor class A member 5	3	17	3	20	0.0447311	1
Q6ZPJ3	Ubiquitin-conjugating enzyme E2 O	5	17	4	20	0.0447311	1
P61967	AP-1 complex subunit sigma-1A	2	18	1	20	-0.0377311	1
Q9Z2L7	Cytokine receptor-like factor 3	3	19	1	20	-0.115734	1
Q923D4	Splicing factor 3B subunit 5	1	19	1	20	-0.115734	1
Q9JHP7	KDEL motif-containing protein 1 precursor	5	20	6	20	-0.189734	1
O54879	High mobility group protein B3	4	21	3	20	-0.260123	1
Q03958	Prefoldin subunit 6	4	21	3	20	-0.260123	1
Q9WTV5	26S proteasome non-ATPase regulatory subunit 9	5	22	1	20	-0.327238	1
P62494	Ras-related protein Rab-11A	6	24	5	20	-0.452769	1
Q09325	Alpha-1,3-mannosyl-glycoprotein 2-beta-N-acetylglucosaminyltransferase	5	27	3	20	-0.622694	1
Q9D0B6	UPF0368 protein Cxorf26 homolog	2	30	2	20	-0.774697	1
Q8K585	High mobility group protein HMG-I/HMG-Y )	4	30	2	20	-0.774697	1
P17425	Hydroxymethylglutaryl-CoA synthase, cytoplasmic	7	33	8	20	-0.9122	1
Q8BXQ2	GPI transamidase component PIG-T precursor	5	34	6	20	-0.955269	1
Q9D1M7	FK506-binding protein 11 precursor	3	35	3	20	-0.997089	1
P61021	Ras-related protein Rab-5B	4	35	2	20	-0.997089	1
P16254	Signal recognition particle 14 kDa protein	4	39	3	20	-1.15321	1
Q9JJA2	Conserved oligomeric Golgi complex subunit 8	1	4	1	21	2.20258	1
Q9QUG2	DNA polymerase kappa	1	4	1	21	2.20258	1
P59326	YTH domain family protein 1	2	4	3	21	2.20258	1
P0C0A3	Charged multivesicular body protein 6	2	5	2	21	1.88066	1
P51569	Alpha-galactosidase A precursor	2	6	2	21	1.61762	1
Q80WW9	Uncharacterized protein C20orf116 homolog precursor	2	6	4	21	1.61762	1
Q6PEC0	Bis-tetraphosphatase	1	7	3	21	1.39523	1
Q6IG02	Keratin, type II cytoskeletal 2 epidermal	2	7	2	21	1.39523	1
P41499	Tyrosine-protein phosphatase non-receptor type 11	6	12	4	21	0.617621	1
Q63942	GTP-binding protein Rab-3D	2	13	1	21	0.502144	1
Q9Z1N4	3',5'-bisphosphate nucleotidase 1	4	13	4	21	0.502144	1
P08649	Complement C4 precursor	3	15	6	21	0.295693	1
Q9QXU8	Cytoplasmic dynein 1 light intermediate chain 1	5	16	6	21	0.202583	1
Q9D2R6	Coiled-coil domain-containing protein 56	3	16	1	21	0.202583	1
Q62203	Splicing factor 3A subunit 2	5	16	3	21	0.202583	1
Q9CYI4	Putative RNA-binding protein Luc7-like 1	3	18	3	21	0.0326583	1
Q60436	Arsenite-resistance protein 2	3	19	5	21	-0.0453443	1
Q8VHB5	Carbonic anhydrase 9 precursor	1	21	1	21	-0.189734	1
Q8K4F7	Scavenger mRNA-decapping enzyme DcpS	6	23	3	21	-0.320979	1
Q8BGE6	Cysteine protease ATG4B	4	23	3	21	-0.320979	1
Q63151	Long-chain-fatty-acid--CoA ligase 3	7	34	6	21	-0.88488	1
O88453	Scaffold attachment factor B	10	37	5	21	-1.00687	1
Q9JID2	Guanine nucleotide-binding protein alpha-11 subunit	5	44	3	21	-1.25685	1
Q9DB25	Dolichyl-phosphate beta-glucosyltransferase	4	47	4	21	-1.35201	1
Q9CR88	28S ribosomal protein S14, mitochondrial	1	3	3	22	2.68473	1
Q8K3K9	GTPase IMAP family member 4	2	6	1	22	1.68473	1
Q9JIQ3	Diablo homolog, mitochondrial precursor	3	6	3	22	1.68473	1
Q9JLC8	Sacsin	4	6	7	22	1.68473	1
Q5M7T1	Protein CIAO1	2	8	2	22	1.2697	1
P08505	Interleukin-6	1	9	2	22	1.09977	1
Q03346	Mitochondrial-processing peptidase subunit beta, mitochondrialprecursor	5	10	8	22	0.947769	1
P70569	Myosin-Vb	5	11	6	22	0.810266	1
P53395	Lipoamide acyltransferase component of branched-chain alpha-keto aciddehydrogenase complex	4	11	3	22	0.810266	1
P22892	AP-1 complex subunit gamma-1	4	13	7	22	0.569258	1
Q8K2T1	NmrA-like family domain-containing protein 1	6	14	2	22	0.462343	1
Q9CR75	Tumor necrosis factor receptor superfamily member 12A precursor	1	14	1	22	0.462343	1
Q9R0J8	Legumain precursor	2	15	5	22	0.362807	1
P22315	Ferrochelatase, mitochondrial precursor	3	15	5	22	0.362807	1
Q9JHS4	ATP-dependent Clp protease ATP-binding subunit clpX-like, mitochondrial	6	16	6	22	0.269697	1
Q8VE88	Protein FAM114A2	3	17	2	22	0.182235	1
P51912	Neutral amino acid transporter B ) -dependentneutral amino acid transporter ASCT2)	3	18	2	22	0.0997725	1
P01041	Cystatin-B	5	18	4	22	0.0997725	1
P61082	NEDD8-conjugating enzyme Ubc12	2	18	1	22	0.0997725	1
Q6PCU2	Vacuolar ATP synthase subunit E 1	3	18	4	22	0.0997725	1
P16043	Somatoliberin precursor	1	20	1	22	-0.0522306	1
Q6P791	UPF0404 protein C11orf59 homolog	2	21	4	22	-0.12262	1
Q9WTX6	Cullin-1	6	21	6	22	-0.12262	1
Q04631	Protein farnesyltransferase/geranylgeranyltransferase type I alphasubunit	5	23	5	22	-0.253864	1
Q8JZQ2	AFG3-like protein 2	5	25	6	22	-0.374159	1
Q8BP48	Methionine aminopeptidase 1	4	27	3	22	-0.48519	1
Q99L04	Dehydrogenase/reductase SDR family member 1	2	27	4	22	-0.48519	1
Q4G063	Cysteine-rich with EGF-like domain protein 2 precursor	5	30	2	22	-0.637193	1
Q8R1I1	Ubiquinol-cytochrome c reductase complex 72 kDa protein	3	30	1	22	-0.637193	1
Q64060	Probable ATP-dependent RNA helicase DDX4	7	37	3	22	-0.939756	1
P32233	Developmentally-regulated GTP-binding protein 1	7	39	6	22	-1.0157	1
Q5U458	DnaJ homolog subfamily C member 11	8	41	6	22	-1.08785	1
Q62798	Paired-related homeobox protein-like 1	2	2	1	23	3.33383	0.173791
P63329	Serine/threonine-protein phosphatase 2B catalytic subunit alphaisoform	3	5	4	23	2.0119	1
Q9D7A6	Signal recognition particle 19 kDa protein	1	8	1	23	1.33383	1
Q9CZT5	Vasorin precursor	2	8	2	23	1.33383	1
P23565	Alpha-internexin	3	9	3	23	1.1639	1
P07861	Neprilysin	2	9	3	23	1.1639	1
Q9ERS2	NADH-ubiquinone oxidoreductase B166 subunit	3	11	3	23	0.874396	1
Q9R064	Golgi reassembly-stacking protein 2	5	12	3	23	0.748865	1
Q9DBG9	Tax1-binding protein 3	1	12	1	23	0.748865	1
Q64422	Glucosamine-6-phosphate isomerase	4	13	3	23	0.633388	1
P70541	Translation initiation factor eIF-2B subunit gamma	3	14	4	23	0.526473	1
Q8BUV8	Protein GPR107 precursor	1	14	1	23	0.526473	1
Q9DBH0	NEDD4-like E3 ubiquitin-protein ligase WWP2	1	14	1	23	0.526473	1
P55288	Cadherin-11 precursor	4	16	5	23	0.333828	1
Q9CQJ6	Density-regulated protein	3	18	3	23	0.163903	1
Q9Z1P6	NADH dehydrogenase 1 alpha subcomplex subunit 7	3	18	3	23	0.163903	1
Q9CR60	Vesicle transport protein GOT1B	3	19	2	23	0.0859003	1
P55213	Caspase-3 precursor	4	20	4	23	0.0118997	1
P42676	Neurolysin, mitochondrial precursor	5	21	7	23	-0.0584896	1
Q9Z2Y8	Proline synthase co-transcribed bacterial homolog protein	4	23	4	23	-0.189734	1
Q61493	DNA polymerase zeta catalytic subunit	5	24	4	23	-0.251135	1
P68511	14-3-3 protein eta	6	27	6	23	-0.42106	1
Q5XIU9	Membrane-associated progesterone receptor component 2	3	27	2	23	-0.42106	1
Q5U367	Procollagen-lysine,2-oxoglutarate 5-dioxygenase 3 precursor	6	30	8	23	-0.573063	1
Q9CQE7	Endoplasmic reticulum-Golgi intermediate compartment protein 3	4	32	6	23	-0.666172	1
Q03145	Ephrin type-A receptor 2 precursor	10	54	5	24	-1.35966	0.483066
Q08775	Runt-related transcription factor 2	1	3	1	24	2.81027	0.530063
P13233	2',3'-cyclic-nucleotide 3'-phosphodiesterase	3	7	4	24	1.58787	1
Q9Z254	PDZ domain-containing protein GIPC1	3	7	4	24	1.58787	1
Q99P39	Cysteine desulfurase, mitochondrial precursor	2	7	6	24	1.58787	1
P09838	DNA nucleotidylexotransferase	1	7	1	24	1.58787	1
P53565	Homeobox protein cut-like 1	4	8	7	24	1.39523	1
P14841	Cystatin-C precursor	1	8	1	24	1.39523	1
Q8K1R3	Polyribonucleotide nucleotidyltransferase 1, mitochondrial precursor	1	9	5	24	1.2253	1
Q80T02	G-protein coupled bile acid receptor 1	2	10	2	24	1.0733	1
P97834	COP9 signalosome complex subunit 1	3	12	5	24	0.810266	1
Q1HFZ0	tRNA -methyltransferase NSUN2	6	16	3	24	0.395228	1
P54823	Probable ATP-dependent RNA helicase DDX6	4	17	6	24	0.307765	1
P54822	Adenylosuccinate lyase	6	17	6	24	0.307765	1
Q62835	Rab GTPase-binding effector protein 2	2	17	1	24	0.307765	1
O08618	Phosphoribosyl pyrophosphate synthetase-associated protein 2	4	19	6	24	0.147301	1
P09456	cAMP-dependent protein kinase type I-alpha regulatory subunit	7	20	4	24	0.0733002	1
Q9Z2N8	Actin-like protein 6A	5	20	5	24	0.0733002	1
O08837	Cell division cycle 5-related protein	9	21	9	24	0.00291092	1
P05765	40S ribosomal protein S21	3	26	4	24	-0.305211	1
Q31125	Zinc transporter SLC39A7	3	26	2	24	-0.305211	1
Q9D8U8	Sorting nexin-5	8	30	6	24	-0.511662	1
Q5XIA1	Nicalin precursor	7	46	8	24	-1.12833	1
Q66HG9	Mitochondrial antiviral-signaling protein	6	48	5	24	-1.18973	1
P43276	Histone H15	5	57	2	25	-1.37877	0.248018
Q9DBZ5	Eukaryotic translation initiation factor 3 subunit 12	7	54	5	25	-1.30077	0.850647
Q5I043	Ubiquitin carboxyl-terminal hydrolase 28	1	4	1	25	2.45412	1
Q9CR41	Huntingtin-interacting protein HYPK	3	5	5	25	2.13219	1
Q9D7P7	Chloride intracellular channel protein 3	3	6	3	25	1.86916	1
P52925	High mobility group protein B2	1	8	8	25	1.45412	1
P26149	3 beta-hydroxysteroid dehydrogenase/Delta 5--4-isomerase type II	1	10	1	25	1.13219	1
A0JPQ9	Chitinase domain-containing protein 1 precursor	3	10	4	25	1.13219	1
Q5XIT9	Methylcrotonoyl-CoA carboxylase beta chain, mitochondrial precursor	5	10	9	25	1.13219	1
Q6P9R2	Serine/threonine-protein kinaseR1	3	10	4	25	1.13219	1
Q9CPT4	Uncharacterized protein C19orf10 homolog precursor	3	13	3	25	0.753682	1
Q9EQQ0	Histone-lysine N-methyltransferase SUV39H2	2	13	2	25	0.753682	1
Q63433	Serine/threonine-protein kinase N1	3	15	1	25	0.547231	1
P20428	Myogenin	2	18	2	25	0.284197	1
Q5FWY5	AH receptor-interacting protein	7	19	7	25	0.206195	1
P18298	S-adenosylmethionine synthetase isoform type-2	3	20	9	25	0.132194	1
Q99JE6	1-phosphatidylinositol-4,5-bisphosphate phosphodiesterase beta 3	8	20	9	25	0.132194	1
Q5XFW8	Protein SEC13 homolog	5	20	5	25	0.132194	1
Q8C6D5	Reticulon-3	2	20	3	25	0.132194	1
Q9QWN8	Spectrin beta chain, non-erythrocytic 2	3	20	3	25	0.132194	1
P08122	Collagen alpha-2 chain	1	21	1	25	0.0618046	1
P62313	U6 snRNA-associated Sm-like protein LSm6	3	21	2	25	0.0618046	1
Q810B6	Ankyrin repeat and FYVE domain-containing protein 1	6	22	4	25	-0.00530959	1
P16675	Lysosomal protective protein precursor	6	22	5	25	-0.00530959	1
Q5M7A4	Ubiquitin-activating enzyme E1 domain-containing protein 1	4	22	3	25	-0.00530959	1
Q9HB97	Alpha-parvin	4	24	7	25	-0.13084	1
P56812	Programmed cell death protein 5	4	26	3	25	-0.246318	1
Q9CXF4	TBC1 domain family member 15	2	28	2	25	-0.353233	1
O35344	Importin subunit alpha-3	6	30	6	25	-0.452769	1
O08808	Protein diaphanous homolog 1	11	35	6	25	-0.675161	1
P36370	Antigen peptide transporter 1	8	36	4	25	-0.715803	1
Q8R1A4	Dedicator of cytokinesis protein 7	3	48	1	25	-1.13084	1
Q9CXW2	Mitochondrial 28S ribosomal protein S22	1	6	3	26	1.92574	1
Q9CX13	Cornichon homolog 4	1	8	1	26	1.51071	1
P59281	Protein KIAA1688	2	8	3	26	1.51071	1
Q5PQN7	Protein LZIC	1	8	2	26	1.51071	1
Q01730	Ras suppressor protein 1	2	9	4	26	1.34078	1
P62994	Growth factor receptor-bound protein 2	2	10	5	26	1.18878	1
Q8CHP5	Protein wibg homolog	2	11	3	26	1.05127	1
Q9ESZ8	General transcription factor II-I	5	21	7	26	0.118388	1
Q5PQV5	Trophoblast glycoprotein precursor	3	21	4	26	0.118388	1
Q8BVE3	Vacuolar ATP synthase subunit H	7	21	4	26	0.118388	1
Q8BUK6	Hook homolog 3	9	26	7	26	-0.189734	1
P82471	Guanine nucleotide-binding protein G subunit alpha	5	27	3	26	-0.244182	1
P70398	Probable ubiquitin carboxyl-terminal hydrolase FAF-X	9	29	9	26	-0.347275	1
Q568Z9	Phytanoyl-CoA hydroxylase-interacting protein	1	30	2	26	-0.396185	1
P63213	Guanine nucleotide-binding protein G/G/G gamma-2 subunitprecursor	2	32	1	26	-0.489294	1
P97697	Inositol monophosphatase -monophosphatase)	5	34	5	26	-0.576757	1
P85007	Immediate early response 3-interacting protein 1	2	34	2	26	-0.576757	1
Q5M7V8	Thyroid hormone receptor-associated protein 3	12	35	9	26	-0.618577	1
Q5FVN0	Membrane-bound O-acyltransferase domain-containing protein 5	6	39	6	26	-0.774697	1
Q6P9J9	Transmembrane protein 16F	6	52	5	26	-1.18973	1
Q62627	PRKC apoptosis WT1 regulator protein	5	63	5	27	-1.41213	0.06525
Q9DC16	Endoplasmic reticulum-Golgi intermediate compartment protein 1	6	59	5	27	-1.31749	0.342026
P70399	Tumor suppressor p53-binding protein 1	1	5	7	27	2.24323	1
P97531	Cdc42-interacting protein 4	4	10	4	27	1.24323	1
Q9WU83	Dolichol-phosphate mannosyltransferase	3	11	3	27	1.10572	1
Q9QUR7	Peptidyl-prolyl cis-trans isomerase NIMA-interacting 1	4	13	4	27	0.864714	1
Q61074	Protein phosphatase 1G	4	14	4	27	0.757798	1
P07633	Propionyl-CoA carboxylase beta chain, mitochondrial precursor	8	17	8	27	0.47769	1
P31254	Ubiquitin-activating enzyme E1 Y	1	17	2	27	0.47769	1
P45352	Thymidylate synthase	5	19	5	27	0.317226	1
Q6X936	Kin of IRRE-like protein 1 precursor	4	20	6	27	0.243225	1
P62898	Cytochrome c, somatic	5	21	6	27	0.172836	1
Q9JMH9	Unconventional myosin-XVIIIa	9	21	10	27	0.172836	1
P62501	TSC22 domain family protein 1	4	22	5	27	0.105722	1
P18581	Low affinity cationic amino acid transporter 2	3	22	4	27	0.105722	1
P15791	Calcium/calmodulin-dependent protein kinase type II subunit delta	8	22	6	27	0.105722	1
O88496	Vitamin K-dependent gamma-carboxylase	7	25	6	27	-0.0787028	1
O54980	Synaptogyrin-2	1	26	1	27	-0.135286	1
Q9CX34	Suppressor of G2 allele of SKP1 homolog	4	27	7	27	-0.189734	1
Q9EQS3	C-Myc-binding protein	4	28	3	27	-0.242202	1
P36536	GTP-binding protein SAR1a	4	30	3	27	-0.341737	1
P29994	Inositol 1,4,5-trisphosphate receptor type 1	14	33	13	27	-0.479241	1
P13832	Myosin regulatory light chain 2-A, smooth muscle isoform	4	34	6	27	-0.52231	1
Q9D0I9	Arginyl-tRNA synthetase, cytoplasmic	5	34	3	27	-0.52231	1
Q8BJ03	Cytochrome c oxidase assembly protein COX15 homolog	5	37	6	27	-0.6443	1
P53042	Serine/threonine-protein phosphatase 5	5	39	6	27	-0.720249	1
P70645	Bleomycin hydrolase	11	40	5	27	-0.756775	1
P61924	Coatomer subunit zeta-1	8	42	3	27	-0.827164	1
Q8R1N4	NudC domain-containing protein 3	4	52	6	27	-1.13529	1
Q6P7Q4	Lactoylglutathione lyase	4	54	2	27	-1.18973	1
P16970	ATP-binding cassette sub-family D member 3	5	62	2	28	-1.33658	0.1771
Q80Y14	Glutaredoxin-related protein 5	1	4	1	28	2.61762	0.269592
Q6NSR8	Probable aminopeptidase NPEPL1	2	9	4	28	1.4477	1
P47875	Cysteine and glycine-rich protein 1	3	13	6	28	0.917181	1
Q2A121	Protein fatso	3	14	4	28	0.810266	1
Q496Z0	Elongator complex protein 2	4	16	5	28	0.617621	1
Q9QYU1	Peroxisomal biogenesis factor 19	5	16	5	28	0.617621	1
P33175	Neuronal kinesin heavy chain	3	17	4	28	0.530158	1
P47727	Carbonyl reductase 1	4	20	9	28	0.295693	1
P19324	47 kDa heat shock protein precursor	10	25	9	28	-0.0262354	1
Q8CIV2	Membralin	3	29	1	28	-0.24036	1
P97496	SWI/SNF complex subunit SMARCC1	7	29	6	28	-0.24036	1
Q9ERN0	Secretory carrier-associated membrane protein 2	2	30	2	28	-0.28927	1
Q8BK08	Transmembrane protein 11	3	30	2	28	-0.28927	1
Q9JHU5	Arfaptin-1	8	31	8	28	-0.336576	1
P31643	Sodium- and chloride-dependent taurine transporter	7	35	5	28	-0.511662	1
Q9CR21	Acyl carrier protein, mitochondrial precursor	2	42	2	28	-0.774697	1
Q6AXM8	Serum paraoxonase/arylesterase 2	7	55	5	28	-1.16374	1
Q8VIH7	Cysteine and tyrosine-rich protein 1 precursor	1	4	1	29	2.66825	0.159672
Q52KK3	Mitochondrial carrier triple repeat protein 1	1	8	2	29	1.66825	1
P13437	3-ketoacyl-CoA thiolase, mitochondrial	5	11	5	29	1.20882	1
Q8K214	Polycomb protein SCMH1	1	12	1	29	1.08328	1
Q6EV70	GDP-fucose protein O-fucosyltransferase 1 precursor	5	19	4	29	0.420319	1
P39749	Flap endonuclease 1	7	21	7	29	0.275929	1
Q60902	Epidermal growth factor receptor substrate 15-like 1	8	24	5	29	0.0832843	1
Q63468	Phosphoribosyl pyrophosphate synthetase-associated protein 1	6	28	7	29	-0.139108	1
Q8CGF7	Transcription elongation regulator 1	10	30	7	29	-0.238644	1
Q9JIX8	Apoptotic chromatin condensation inducer in the nucleus	5	41	8	29	-0.689305	1
Q61810	Latent-transforming growth factor beta-binding protein 3 precursor	1	6	2	30	2.13219	1
Q9D5Y1	Coiled-coil domain-containing protein 39	1	8	1	30	1.71716	1
O88696	ATP-dependent Clp protease proteolytic subunit, mitochondrial	1	9	3	30	1.54723	1
P20070	NADH-cytochrome b5 reductase	4	13	9	30	1.01672	1
Q9R0T8	Inhibitor of nuclear factor kappa-B kinase subunit epsilon	1	20	1	30	0.395228	1
P97571	Calpain-1 catalytic subunit	6	22	8	30	0.257725	1
Q8BVQ5	Protein phosphatase methylesterase 1	5	26	4	30	0.0167167	1
Q498R3	DnaJ homolog subfamily C member 10 precursor	7	27	6	30	-0.0377311	1
Q8R1F1	Niban-like protein	6	27	6	30	-0.0377311	1
Q8BU30	Isoleucyl-tRNA synthetase, cytoplasmic	6	28	5	30	-0.0901985	1
P27546	Microtubule-associated protein 4	10	33	5	30	-0.327238	1
P11167	Solute carrier family 2, facilitated glucose transporter member 1	7	34	5	30	-0.370306	1
Q8VBZ3	Cleft lip and palate transmembrane protein 1 homolog	6	43	5	30	-0.709108	1
P28073	Proteasome subunit beta type 6 precursor	6	45	3	30	-0.774697	1
Q68FQ2	Junctional adhesion molecule C precursor	7	53	5	30	-1.01076	1
P08503	Medium-chain specific acyl-CoA dehydrogenase, mitochondrial precursor	2	4	3	31	2.76446	0.0554988
Q62868	Rho-associated protein kinase 2	4	11	11	31	1.30503	1
Q6QI44	TPR repeat-containing protein C12orf30 homolog	4	13	5	31	1.06402	1
Q63028	Alpha-adducin	8	13	7	31	1.06402	1
Q9WTS2	Alpha--fucosyltransferase	4	13	7	31	1.06402	1
Q80VL1	Tudor and KH domain-containing protein	4	13	6	31	1.06402	1
Q5M823	NudC domain-containing protein 2	5	16	6	31	0.764462	1
P16446	Phosphatidylinositol transfer protein alpha isoform	3	17	7	31	0.676999	1
Q32Q06	AP-1 complex subunit mu-1	5	17	7	31	0.676999	1
Q5U211	Sorting nexin-3	3	17	3	31	0.676999	1
Q02053	Ubiquitin-activating enzyme E1 1	10	19	10	31	0.516535	1
Q9WVS2	Probable O-sialoglycoprotein endopeptidase	2	20	3	31	0.442534	1
P12368	cAMP-dependent protein kinase type II-alpha regulatory subunit	8	25	6	31	0.120606	1
Q4KLF8	Actin-related protein 2/3 complex subunit 5	6	27	6	31	0.00957465	1
Q01721	Growth-arrest-specific protein 1 precursor	5	27	5	31	0.00957465	1
Q6P742	Proteolipid protein 2	3	31	2	31	-0.189734	1
Q62448	Eukaryotic translation initiation factor 4 gamma 2	8	31	7	31	-0.189734	1
P56135	ATP synthase f chain, mitochondrial	1	34	1	31	-0.323001	1
Q68FL6	Methionyl-tRNA synthetase, cytoplasmic	13	37	10	31	-0.444991	1
Q61390	T-complex protein 1 subunit zeta-2	6	37	5	31	-0.444991	1
Q99LT0	Dpy-30-like protein	4	39	3	31	-0.52094	1
Q8R5C5	Beta-centractin	3	41	5	31	-0.59309	1
Q6PDU1	Splicing factor, arginine/serine-rich 2	3	42	4	31	-0.627855	1
P35280	Ras-related protein Rab-8A	7	47	5	31	-0.790127	1
Q9WVA3	Mitotic checkpoint protein BUB3	6	47	3	31	-0.790127	1
Q4V888	Transmembrane protein 55A	6	47	5	31	-0.790127	1
Q9DC70	NADH dehydrogenase iron-sulfur protein 7, mitochondrialprecursor	3	48	3	31	-0.8205	1
P63170	Dynein light chain 1, cytoplasmic	4	10	3	32	1.48834	1
Q9CQM5	Thioredoxin-like protein 5	3	13	4	32	1.10983	1
Q9CR51	Vacuolar ATP synthase subunit G 1	3	16	2	32	0.810266	1
Q8CIG8	Protein arginine N-methyltransferase 5	3	18	5	32	0.640341	1
Q9JHY2	Sideroflexin-3	3	18	3	32	0.640341	1
Q66HF9	Leucine-rich repeat flightless-interacting protein 1	5	22	7	32	0.350834	1
Q9Z339	Glutathione transferase omega-1	5	25	7	32	0.16641	1
Q58FK9	Kynurenine--oxoglutarate transaminase 3	4	25	3	32	0.16641	1
Q6P8X1	Sorting nexin-6	4	30	3	32	-0.0966248	1
Q922D4	SAPS domain family member 3	9	32	8	32	-0.189734	1
Q91WK2	Eukaryotic translation initiation factor 3 subunit 3	10	40	5	32	-0.511662	1
O09106	Histone deacetylase 1	5	48	3	32	-0.774697	1
Q80W89	NADH dehydrogenase 1 alpha subcomplex subunit 11	6	56	5	32	-0.997089	1
Q9DCH4	Eukaryotic translation initiation factor 3 subunit 5	8	69	2	33	-1.25386	0.165432
Q9ERU9	E3 SUMO-protein ligase RanBP2	6	9	9	33	1.68473	1
Q9R0P4	Small acidic protein	2	10	3	33	1.53273	1
P61959	Small ubiquitin-related modifier 2 precursor	2	11	3	33	1.39523	1
Q62950	Dihydropyrimidinase-related protein 1	3	14	6	33	1.04731	1
Q8VBU2	Protein NDRG2	5	16	9	33	0.85466	1
O54984	Arsenical pump-driving ATPase	4	16	7	33	0.85466	1
Q8BTE0	UPF0369 protein C6orf57 homolog precursor	1	18	1	33	0.684735	1
Q75UQ2	Craniofacial development protein 1	3	20	5	33	0.532732	1
Q9ER88	Mitochondrial 28S ribosomal protein S29	4	20	4	33	0.532732	1
Q5U1X1	Oligoribonuclease, mitochondrial precursor	4	21	4	33	0.462343	1
P62305	Small nuclear ribonucleoprotein E	2	21	2	33	0.462343	1
Q6PDI5	Proteasome-associated protein ECM29 homolog	6	22	5	33	0.395228	1
P48024	Eukaryotic translation initiation factor 1	3	24	3	33	0.269697	1
Q9Z1Y3	Cadherin-2 precursor	8	30	8	33	-0.0522306	1
Q9WU49	Calcium-regulated heat stable protein 1	3	30	4	33	-0.0522306	1
Q6IMF3	Keratin, type II cytoskeletal 1	7	32	6	33	-0.14534	1
Q9ERS2	NADH dehydrogenase 1 alpha subcomplex subunit 13	2	32	2	33	-0.14534	1
Q9JM53	Programmed cell death protein 8, mitochondrial precursor	11	33	11	33	-0.189734	1
Q08851	Syntaxin-5	3	33	4	33	-0.189734	1
P40112	Proteasome subunit beta type 3	3	33	5	33	-0.189734	1
Q921F4	Heterogeneous nuclear ribonucleoprotein L-like	9	37	7	33	-0.354793	1
Q9CWZ3	RNA-binding protein 8A	5	51	5	33	-0.817765	1
Q60722	Transcription factor 4	1	6	2	34	2.31277	0.168367
P27881	Hexokinase-2	3	8	9	34	1.89773	1
Q4V8K2	Beta-catenin-like protein 1	5	10	11	34	1.5758	1
Q9JKS6	Protein piccolo	6	10	11	34	1.5758	1
Q5U2U7	mRNA cap guanine-N7 methyltransferase -)-methyltransferase)	3	10	2	34	1.5758	1
O54874	Serine/threonine-protein kinase MRCK alpha	3	13	3	34	1.19729	1
P09495	Tropomyosin alpha-4 chain	2	16	5	34	0.897729	1
Q9DCG9	TRM112-like protein	3	17	3	34	0.810266	1
P84817	Mitochondrial fission 1 protein	4	18	3	34	0.727804	1
P97379	Ras GTPase-activating protein-binding protein 2	5	18	4	34	0.727804	1
Q9EPY0	Caspase recruitment domain-containing protein 9	4	20	2	34	0.575801	1
O09175	Aminopeptidase B	4	24	7	34	0.312766	1
P18421	Proteasome subunit beta type 1 precursor	4	26	5	34	0.197289	1
Q8K1Q0	Glycylpeptide N-tetradecanoyltransferase 1	9	39	8	34	-0.387674	1
Q4KM65	Cleavage and polyadenylation specificity factor 5	5	40	7	34	-0.424199	1
Q8R2Y8	Peptidyl-tRNA hydrolase 2, mitochondrial precursor	2	41	2	34	-0.459823	1
P13264	Glutaminase kidney isoform, mitochondrial precursor	11	49	7	34	-0.716981	1
Q6KCD5	Nipped-B-like protein	1	6	4	35	2.35459	0.102914
P14685	26S proteasome non-ATPase regulatory subunit 3	8	69	11	35	-1.16898	0.453528
P62836	Ras-related protein Rap-1A precursor	7	67	7	35	-1.12654	0.942711
P47819	Glial fibrillary acidic protein	4	12	5	35	1.35459	1
Q9R257	Heme-binding protein 1	4	14	4	35	1.13219	1
P61203	COP9 signalosome complex subunit 2	5	22	5	35	0.480117	1
Q9D662	Protein transport protein Sec23B	6	24	6	35	0.354586	1
P28023	Dynactin subunit 1	9	26	11	35	0.239109	1
Q9JK81	UPF0160 protein MYG1	5	26	4	35	0.239109	1
Q5HZV9	Protein phosphatase 1 regulatory subunit 7	3	33	7	35	-0.104845	1
O35964	SH3-containing GRB2-like protein 1	5	33	7	35	-0.104845	1
P62315	Small nuclear ribonucleoprotein Sm D1	3	33	4	35	-0.104845	1
Q9DCJ5	NADH-ubiquinone oxidoreductase 19 kDa subunit	3	35	3	35	-0.189734	1
Q9QXT0	MIR-interacting saposin-like protein precursor	3	38	5	35	-0.308379	1
Q63707	Dihydroorotate dehydrogenase, mitochondrial precursor	8	41	5	35	-0.418003	1
P18484	AP-2 complex subunit alpha-2	10	43	5	35	-0.486716	1
P62912	60S ribosomal protein L32	5	46	6	35	-0.584013	1
Q9JHW1	Carboxypeptidase D precursor	12	49	13	35	-0.675161	1
P19014	Hemoglobin subunit alpha	1	49	1	35	-0.675161	1
Q9JLB2	MAGUK p55 subfamily member 5	3	8	8	36	1.98019	0.579107
Q3UMQ8	H/ACA ribonucleoprotein complex non-core subunit NAF1	1	8	2	36	1.98019	0.579107
Q9WTT7	Basic leucine zipper and W2 domain-containing protein 2	3	12	4	36	1.39523	1
Q9ER24	Ataxin-10	7	25	7	36	0.336335	1
Q8BK72	Mitochondrial 28S ribosomal protein S27	7	26	5	36	0.279751	1
Q499N3	WD repeat protein 18	1	28	2	36	0.172836	1
P24547	Inosine-5'-monophosphate dehydrogenase 2	3	32	4	36	-0.0198092	1
Q63362	NADH dehydrogenase 1 alpha subcomplex subunit 5	4	35	6	36	-0.149092	1
P08050	Gap junction alpha-1 protein	7	45	6	36	-0.511662	1
Q60445	Coatomer subunit epsilon	7	46	6	36	-0.543371	1
Q9Z1M9	Structural maintenance of chromosomes protein 1A	10	50	15	36	-0.663665	1
Q8CJC2	C-jun-amino-terminal kinase-interacting protein 4	7	7	8	37	2.21236	0.125616
P70490	Lactadherin precursor	10	73	9	37	-1.17011	0.272241
P12843	Insulin-like growth factor-binding protein 2 precursor	3	9	7	37	1.84979	0.968569
Q8BL66	Early endosome antigen 1	6	15	10	37	1.11283	1
Q99JI4	26S proteasome non-ATPase regulatory subunit 6	9	27	7	37	0.264832	1
Q64550	UDP-glucuronosyltransferase 1-1 precursor	3	33	3	37	-0.0246749	1
P18395	Cold shock domain-containing protein E1	9	34	9	37	-0.0677436	1
Q6AYS7	Aminoacylase-1A	6	35	5	37	-0.109564	1
P28075	Proteasome subunit beta type 5 precursor	8	36	8	37	-0.150206	1
Q9CQ60	6-phosphogluconolactonase	4	36	2	37	-0.150206	1
P11662	NADH-ubiquinone oxidoreductase chain 2	1	36	1	37	-0.150206	1
P35281	Ras-related protein Rab-10	9	43	6	37	-0.406546	1
Q62376	U1 small nuclear ribonucleoprotein 70 kDa	14	50	4	37	-0.624137	1
O35093	Mitochondrial import inner membrane translocase subunit Tim23	5	55	6	37	-0.761641	1
Q921M7	Protein FAM49B	3	12	5	38	1.47323	1
Q8R0W0	Epiplakin	2	16	5	38	1.05819	1
Q4V7A0	WD repeat protein 61	2	16	5	38	1.05819	1
Q7M767	Ubiquitin-conjugating enzyme E2 variant 2	4	17	6	38	0.970731	1
Q99LE6	ATP-binding cassette sub-family F member 2	5	20	2	38	0.736265	1
Q9JMB5	Protein ADRM1	2	28	3	38	0.250838	1
P07154	Cathepsin L precursor	5	29	4	38	0.200212	1
P18422	Proteasome subunit alpha type 3	8	30	8	38	0.151303	1
O70593	Small glutamine-rich tetratricopeptide repeat-containing protein A	8	34	8	38	-0.0292695	1
Q5I0P2	Glycine cleavage system H protein, mitochondrial precursor	6	35	2	38	-0.0710897	1
P37879	Lysyl-tRNA synthetase	7	35	7	38	-0.0710897	1
O54990	Prominin-1 precursor	2	42	1	38	-0.334124	1
Q8K3F3	Protein phosphatase 1 regulatory subunit 14B	9	47	6	38	-0.496396	1
Q9QZA6	CD151 antigen	4	54	4	38	-0.696694	1
Q6AYQ4	Transmembrane protein 109 precursor	3	67	4	38	-1.0079	1
Q9Z336	Dynein light chain Tctex-type 1	2	17	3	39	1.00821	1
Q63228	Glia maturation factor beta	6	22	6	39	0.636236	1
Q62848	ADP-ribosylation factor GTPase-activating protein 1	6	25	8	39	0.451812	1
Q5XIF3	NADH dehydrogenase iron-sulfur protein 4, mitochondrialprecursor	4	28	6	39	0.288313	1
O70591	Prefoldin subunit 2	6	39	5	39	-0.189734	1
P07178	Histidyl-tRNA synthetase, cytoplasmic	7	43	7	39	-0.330597	1
P70372	ELAV-like protein 1	7	45	7	39	-0.396185	1
Q07205	Eukaryotic translation initiation factor 5	8	47	4	39	-0.458921	1
Q9CYG7	Mitochondrial import receptor subunit TOM34	7	48	5	39	-0.489294	1
Q566D0	Uroplakin-1b	5	55	4	39	-0.685692	1
Q9WUA2	Phenylalanyl-tRNA synthetase beta chain	11	62	7	39	-0.858528	1
Q91XU8	Phosphatidate cytidylyltransferase 2	3	65	4	39	-0.9267	1
Q62920	PDZ and LIM domain protein 5	15	69	9	39	-1.01286	1
Q9QXY4	Opioid growth factor receptor	3	10	7	40	1.81027	0.655838
P48722	Heat shock 70 kDa protein 4L	5	12	11	40	1.54723	1
Q9R101	Hormone-sensitive lipase	1	17	2	40	1.04473	1
O35547	Long-chain-fatty-acid--CoA ligase 4	5	19	11	40	0.884266	1
Q9DD18	Probable D-tyrosyl-tRNA deacylase 1	5	19	7	40	0.884266	1
Q9ES40	PRA1 family protein 3	5	28	4	40	0.324839	1
Q811A2	Bone marrow stromal antigen 2 precursor	2	29	1	40	0.274213	1
Q6P7P5	Basic leucine zipper and W2 domain-containing protein 1	5	29	5	40	0.274213	1
Q99LR1	Abhydrolase domain-containing protein 12	4	35	3	40	0.00291092	1
P63036	DnaJ homolog subfamily A member 1	8	38	5	40	-0.115734	1
P62997	Splicing factor, arginine/serine-rich 10	7	41	5	40	-0.225358	1
O54873	Multisynthetase complex auxiliary component p43	8	42	6	40	-0.260123	1
Q8BRH0	Transmembrane and TPR repeat-containing protein 3	6	43	6	40	-0.294071	1
P61983	14-3-3 protein gamma	6	45	7	40	-0.359659	1
Q9QY17	Protein kinase C and casein kinase substrate in neurons 2 protein	6	48	8	40	-0.452769	1
P49088	Asparagine synthetase	7	48	8	40	-0.452769	1
P51863	Vacuolar ATP synthase subunit d 1	7	53	5	40	-0.595727	1
Q7TNY6	Golgi resident protein GCP60	6	16	4	41	1.16782	1
Q6UPE1	Electron transfer flavoprotein-ubiquinone oxidoreductase,mitochondrial precursor	8	23	8	41	0.644256	1
Q91ZU6	Bullous pemphigoid antigen 1, isoforms 1/2/3/4	15	25	20	41	0.523962	1
Q920D2	Dihydrofolate reductase	3	25	3	41	0.523962	1
O55125	Protein NipSnap1	7	25	7	41	0.523962	1
Q9D7S7	Ribosomal protein L22-like 1	3	26	2	41	0.467378	1
Q63321	Procollagen-lysine,2-oxoglutarate 5-dioxygenase 1 precursor	7	28	7	41	0.360463	1
Q9QXK3	Coatomer subunit gamma-2	7	30	8	41	0.260927	1
Q642C0	DnaJ homolog subfamily C member 8	6	30	5	41	0.260927	1
Q64674	Spermidine synthase	7	33	6	41	0.123424	1
Q923V8	15 kDa selenoprotein precursor	6	37	8	41	-0.0416355	1
Q99MR6	Arsenite-resistance protein 2	10	53	6	41	-0.560103	1
Q641X8	Eukaryotic translation initiation factor 3 subunit 6	8	62	6	41	-0.786378	1
P84089	Enhancer of rudimentary homolog	3	24	3	42	0.617621	1
Q9JHW0	Proteasome subunit beta type 7 precursor	5	25	6	42	0.558727	1
Q4QQV8	Charged multivesicular body protein 5	3	27	6	42	0.447696	1
O88994	MOSC domain-containing protein 2, mitochondrial precursor	6	29	1	42	0.344602	1
P08955	CAD protein	7	31	7	42	0.248387	1
P97576	GrpE protein homolog 1, mitochondrial precursor	11	39	12	42	-0.082819	1
P27008	Poly polymerase 1 ADP-ribosyltransferase 1)	12	39	11	42	-0.082819	1
Q7TNC4	Putative RNA-binding protein Luc7-like 2	6	41	3	42	-0.154969	1
P46413	Glutathione synthetase	9	43	3	42	-0.223681	1
Q9WVB1	Ras-related protein Rab-6A	6	54	9	42	-0.552304	1
P62076	Mitochondrial import inner membrane translocase subunit Tim13	7	56	5	42	-0.604772	1
Q498U4	Nuclear protein Hcc-1	8	58	5	42	-0.655398	1
O88813	Long-chain-fatty-acid--CoA ligase 5	10	67	6	42	-0.863506	1
Q64542	Plasma membrane calcium-transporting ATPase 4	8	70	12	42	-0.9267	1
Q80Z29	Nicotinamide phosphoribosyltransferase	4	9	3	43	2.06661	0.0655873
Q9EQR2	Alkyldihydroxyacetonephosphate synthase, peroxisomal precursor	4	18	6	43	1.06661	1
P62628	Dynein light chain roadblock-type 1	3	21	4	43	0.844213	1
O55012	Phosphatidylinositol-binding clathrin assembly protein	5	23	4	43	0.712969	1
Q922F4	Tubulin beta-6 chain	3	24	4	43	0.651568	1
Q76MZ3	Serine/threonine-protein phosphatase 2A 65 kDa regulatory subunit Aalpha isoform	6	28	8	43	0.429176	1
P40307	Proteasome subunit beta type 2	6	32	8	43	0.236531	1
P23492	Purine nucleoside phosphorylase	5	35	3	43	0.107248	1
P63326	40S ribosomal protein S10	9	56	4	43	-0.570824	1
Q3UIU2	NADH dehydrogenase 1 beta subcomplex subunit 6	2	58	1	43	-0.62145	1
O70536	Sterol O-acyltransferase 1	11	72	7	43	-0.933394	1
P37199	Nuclear pore complex protein Nup155	3	11	9	44	1.81027	0.288757
P84092	AP-2 complex subunit mu-1	6	23	7	44	0.746136	1
Q6AXS3	Protein DEK	5	39	7	44	-0.0157048	1
P97690	Structural maintenance of chromosomes protein 3	15	47	14	44	-0.284891	1
P30823	High affinity cationic amino acid transporter 1	11	53	7	44	-0.458223	1
Q2TL32	Zinc finger UBR1-type protein 1	23	58	14	44	-0.588284	1
P97700	Mitochondrial 2-oxoglutarate/malate carrier protein	7	73	6	44	-0.920127	1
Q63357	Myosin-Id	8	18	12	45	1.13219	1
P68255	14-3-3 protein theta	2	20	5	45	0.980191	1
Q66H12	Alpha-N-acetylgalactosaminidase precursor	5	28	5	45	0.494764	1
P24051	40S ribosomal protein S27-like protein	6	31	5	45	0.347923	1
Q8BGQ7	Alanyl-tRNA synthetase, cytoplasmic	3	41	6	45	-0.0554331	1
P22985	Xanthine dehydrogenase/oxidase	9	41	9	45	-0.0554331	1
Q62393	Tumor protein D52	6	42	4	45	-0.0901985	1
P17046	Lysosome-associated membrane glycoprotein 2 precursor	6	46	4	45	-0.221443	1
Q7TSV4	Phosphoglucomutase-2	7	49	6	45	-0.312591	1
P60901	Proteasome subunit alpha type 6	9	56	11	45	-0.505236	1
Q9Z2M7	Phosphomannomutase 2	6	37	8	46	0.124374	1
Q63768	Proto-oncogene C-crk	5	42	8	46	-0.0584896	1
P40615	H/ACA ribonucleoprotein complex subunit 4	9	43	11	46	-0.092437	1
Q8VH51	RNA-binding protein 39	5	44	5	46	-0.125604	1
Q64400	Histone H32	1	76	1	46	-0.9141	1
P41350	Caveolin-1	5	80	4	46	-0.9881	1
Q9WVR7	Protein phosphatase 1F /calmodulin-dependentprotein kinase phosphatase)	4	11	7	47	1.90542	0.0786475
P46938	65 kDa Yes-associated protein	7	19	5	47	1.11693	1
Q499N6	SAPK substrate protein 1	5	24	6	47	0.779892	1
Q9JIL3	Interleukin enhancer-binding factor 3	8	25	14	47	0.720998	1
Q9JHB5	Translin-associated protein X	4	28	8	47	0.5575	1
Q9R1J8	Prolyl 3-hydroxylase 1 precursor	6	31	6	47	0.410658	1
Q6AXX6	Uncharacterized protein C10orf58 homolog precursor	8	32	4	47	0.364855	1
Q80X50	Ubiquitin-associated protein 2-like	7	57	8	47	-0.468035	1
Q9ER00	Syntaxin-12	5	60	4	47	-0.542036	1
P62246	40S ribosomal protein S15a	11	76	5	47	-0.883073	1
P02770	Serum albumin precursor	11	88	7	48	-1.0642	0.20096
Q80UM3	NMDA receptor-regulated protein 1	6	16	9	48	1.39523	1
P42669	Transcriptional activator protein Pur-alpha	3	18	4	48	1.2253	1
P07335	Creatine kinase B-type	4	22	6	48	0.935797	1
Q99M74	Keratin, type II cuticular Hb2	2	30	2	48	0.488338	1
Q9CQL1	Protein mago nashi homolog 1-related	5	31	6	48	0.441032	1
P17426	AP-2 complex subunit alpha-1	8	33	11	48	0.350834	1
Q9CQ75	NADH dehydrogenase 1 alpha subcomplex subunit 2	2	39	2	48	0.109826	1
Q6GSS7	Histone H2A type 2-A	1	44	1	48	-0.0642033	1
Q9QXZ0	Microtubule-actin cross-linking factor 1	25	45	16	48	-0.0966248	1
Q10728	Protein phosphatase 1 regulatory subunit 12A	11	53	11	48	-0.332692	1
Q9CRD2	Tetratricopeptide repeat protein 35	5	58	5	48	-0.462753	1
Q10473	Polypeptide N-acetylgalactosaminyltransferase 1	7	62	5	48	-0.558968	1
Q8JZN5	Acyl-CoA dehydrogenase family member 9, mitochondrial precursor	6	66	7	48	-0.649166	1
Q9QZR6	Septin-9	6	18	10	49	1.25505	1
P62138	Serine/threonine-protein phosphatase PP1-alpha catalytic subunit	3	18	8	49	1.25505	1
Q9QYU2	Elongation factor Ts, mitochondrial precursor	7	19	8	49	1.17705	1
Q62165	Dystroglycan precursor	5	21	6	49	1.03266	1
P53812	Phosphatidylinositol transfer protein beta isoform	7	22	6	49	0.965544	1
P11497	Acetyl-CoA carboxylase 1	2	23	6	49	0.901414	1
Q62698	Cytoplasmic dynein 1 light intermediate chain 2	7	30	7	49	0.518085	1
P97608	5-oxoprolinase	9	30	11	49	0.518085	1
Q5RJR2	Twinfilin-1	7	33	9	49	0.380582	1
Q9JJ22	Adipocyte-derived leucine aminopeptidase precursor	10	36	9	49	0.255051	1
P61023	Calcium-binding protein p22	8	43	10	49	-0.00128907	1
P61164	Alpha-centractin	6	46	4	49	-0.0985863	1
Q8C166	Copine-1	8	59	7	49	-0.457667	1
P48004	Proteasome subunit alpha type 7	7	61	5	49	-0.505762	1
Q924S1	1-acyl-sn-glycerol-3-phosphate acyltransferase delta	10	71	8	49	-0.724771	1
P20417	Tyrosine-protein phosphatase non-receptor type 1	11	91	11	50	-1.05367	0.170883
Q08013	Translocon-associated protein subunit gamma	4	88	1	50	-1.00531	0.465465
P41565	Isocitrate dehydrogenase subunit gamma, mitochondrial precursor -specific ICDH)	6	23	7	50	0.93056	1
Q8BJ71	Nuclear pore complex protein Nup93	7	26	8	50	0.753682	1
Q811S9	Guanine nucleotide-binding protein-like 3	8	28	6	50	0.646767	1
Q2PQA9	Kinesin heavy chain	8	34	9	50	0.366659	1
P35465	Serine/threonine-protein kinase PAK 1	9	37	8	50	0.244669	1
O08583	THO complex subunit 4	5	45	5	50	-0.0377311	1
Q7TQ94	Nitrilase homolog 1	4	56	5	50	-0.353233	1
Q6NVF9	Cleavage and polyadenylation specificity factor 6	8	59	6	50	-0.428521	1
P46844	Biliverdin reductase A precursor	8	65	8	50	-0.568246	1
Q05096	Myosin-Ib	5	21	6	51	1.09037	1
Q68FX1	Mannose-6-phosphate isomerase	7	25	9	51	0.838835	1
Q8BK64	Activator of 90 kDa heat shock protein ATPase homolog 1	8	28	9	51	0.675336	1
Q8K3J1	NADH dehydrogenase iron-sulfur protein 8, mitochondrialprecursor	3	33	3	51	0.438297	1
P52800	Ephrin-B2 precursor	7	37	5	51	0.273238	1
Q8BIG7	Catechol-O-methyltransferase domain-containing protein 1	3	48	3	51	-0.102271	1
Q6VV72	Eukaryotic translation initiation factor 1A	3	30	4	52	0.603815	1
Q99KV1	DnaJ homolog subfamily B member 11 precursor	7	38	6	52	0.262778	1
P61354	60S ribosomal protein L27	5	40	2	52	0.188777	1
Q9CSU0	Uncharacterized protein C20orf77 homolog	7	41	5	52	0.153154	1
Q3SWU3	Heterogeneous nuclear ribonucleoprotein D-like	8	42	6	52	0.118388	1
P24155	Thimet oligopeptidase	9	52	8	52	-0.189734	1
Q68FS2	COP9 signalosome complex subunit 4	12	64	8	52	-0.489294	1
Q9WTV0	Prolactin regulatory element-binding protein	6	74	3	52	-0.698748	1
Q5I0H4	Transmembrane and coiled-coil domains protein 1	6	79	5	52	-0.793075	1
Q9EPJ0	Nuclear ubiquitous casein and cyclin-dependent kinases substrate	5	17	9	53	1.45072	0.875511
Q6P7A9	Lysosomal alpha-glucosidase precursor	5	27	7	53	0.783299	1
P07895	Superoxide dismutase , mitochondrial precursor	2	27	2	53	0.783299	1
Q9CQH7	Transcription factor BTF3 homolog 4	5	28	6	53	0.730831	1
Q9EPU0	Regulator of nonsense transcripts 1	9	34	10	53	0.450723	1
P34064	Proteasome subunit alpha type 5	9	37	9	53	0.328733	1
P63004	Platelet-activating factor acetylhydrolase IB alpha subunit	10	59	7	53	-0.344457	1
Q61545	RNA-binding protein EWS	5	67	3	53	-0.527903	1
P21550	Beta-enolase	2	74	1	53	-0.671267	1
P50309	Glucose-6-phosphate isomerase	6	74	4	53	-0.671267	1
Q9JM76	Actin-related protein 2/3 complex subunit 3	4	14	6	54	1.7578	0.0582252
Q9WVK7	Hydroxyacyl-coenzyme A dehydrogenase, mitochondrial	3	18	9	54	1.39523	1
Q505F5	Leucine-rich repeat-containing protein 47	7	29	8	54	0.707172	1
Q9D3P8	Uncharacterized protein C9orf46 homolog	4	32	4	54	0.565153	1
Q99MI7	NEDD8-activating enzyme E1 catalytic subunit	9	37	7	54	0.3557	1
O08701	Arginase-2, mitochondrial	3	38	5	54	0.317226	1
Q8R050	G1 to S phase transition protein 1 homolog	11	49	10	54	-0.0495565	1
Q8VDP4	Protein KIAA1967 homolog	10	49	9	54	-0.0495565	1
Q9DCS9	NADH dehydrogenase 1 beta subcomplex subunit 10	5	56	3	54	-0.242202	1
P37889	Fibulin-2 precursor	8	57	7	54	-0.267737	1
P08430	UDP-glucuronosyltransferase 1-6 precursor	7	63	8	54	-0.412127	1
P84104	Splicing factor, arginine/serine-rich 3	6	66	5	54	-0.479241	1
P62870	Transcription elongation factor B polypeptide 2	12	71	7	54	-0.584594	1
P54921	Alpha-soluble NSF attachment protein	6	16	13	55	1.59163	0.196271
O54952	Breast cancer type 1 susceptibility protein homolog	5	20	3	55	1.2697	1
Q921Z5	Tumor necrosis factor, alpha-induced protein 8	3	46	3	55	0.0680636	1
P84097	Rho-related GTP-binding protein RhoG precursor	6	50	5	55	-0.0522306	1
Q9UEU9	GTP-binding nuclear protein Ran	8	60	5	55	-0.315265	1
Q8CG09	Multidrug resistance-associated protein 1 transporter)	16	75	14	55	-0.637193	1
Q8BH04	Phosphoenolpyruvate carboxykinase , mitochondrial precursor	5	23	7	56	1.09406	1
O88543	COP9 signalosome complex subunit 3	6	26	7	56	0.917181	1
P26369	Splicing factor U2AF 65 kDa subunit	5	30	7	56	0.71073	1
P97479	Myosin-VIIa	4	31	3	56	0.663424	1
Q8VBT0	Thioredoxin domain-containing protein 1 precursor	2	34	1	56	0.530158	1
Q9D554	Splicing factor 3A subunit 3	10	43	10	56	0.191356	1
Q4VSI4	Ubiquitin carboxyl-terminal hydrolase 7	10	43	13	56	0.191356	1
O35900	U6 snRNA-associated Sm-like protein LSm2	4	49	5	56	0.00291092	1
P05964	Protein S100-A6	3	56	9	56	-0.189734	1
P23785	Granulins precursor	6	69	4	56	-0.490904	1
Q62786	Prostaglandin F2 receptor negative regulator precursor	12	70	11	56	-0.511662	1
P25086	Interleukin-1 receptor antagonist protein precursor	6	31	5	57	0.68896	1
P34901	Syndecan-4 precursor	6	32	6	57	0.643156	1
Q5I0J9	Putative L-aspartate dehydrogenase	2	33	3	57	0.598762	1
P13852	Major prion protein precursor	5	42	6	57	0.250838	1
Q91WS0	Zinc finger CDGSH domain-containing protein 1	4	43	3	57	0.216891	1
Q80V26	Inositol monophosphatase 3 -monophosphatase 3)	6	47	6	57	0.088567	1
P80237	Rho GDP-dissociation inhibitor 1	4	65	4	57	-0.379212	1
O35824	DnaJ homolog subfamily A member 2	9	73	4	57	-0.546669	1
Q9CQE8	Protein C14orf166 homolog	9	82	7	57	-0.714396	1
O35094	Import inner membrane translocase subunit TIM44, mitochondrialprecursor	8	22	13	58	1.20882	1
Q505J8	Phenylalanyl-tRNA synthetase alpha chain	8	38	8	58	0.420319	1
Q8BJW6	Eukaryotic translation initiation factor 2A	10	40	9	58	0.346319	1
P56522	NADPH:adrenodoxin oxidoreductase, mitochondrial precursor reductase)	6	64	10	58	-0.331753	1
P24049	60S ribosomal protein L17	7	70	7	58	-0.461036	1
Q91Y78	Ubiquitin carboxyl-terminal hydrolase isozyme L3	8	70	7	58	-0.461036	1
Q5XI31	GPI transamidase component PIG-S	6	73	6	58	-0.521578	1
Q8BSY0	Aspartyl/asparaginyl beta-hydroxylase	4	42	6	59	0.300591	1
Q62446	FK506-binding protein 3	9	43	6	59	0.266644	1
Q7TP98	Interleukin enhancer-binding factor 2	11	46	6	59	0.169347	1
Q9WVJ2	26S proteasome non-ATPase regulatory subunit 13	13	48	9	59	0.107946	1
Q63190	Emerin	6	50	6	59	0.0490527	1
P39069	Adenylate kinase isoenzyme 1	6	24	6	60	1.13219	1
P15205	Microtubule-associated protein 1B	10	32	10	60	0.717156	1
Q61655	ATP-dependent RNA helicase DDX19A	6	32	4	60	0.717156	1
O55201	Transcription elongation factor SPT5	12	32	11	60	0.717156	1
Q9CXU9	Eukaryotic translation initiation factor 1b	5	36	7	60	0.547231	1
Q9WU28	Prefoldin subunit 5	5	37	4	60	0.507703	1
Q8BH97	Reticulocalbin-3 precursor	3	43	8	60	0.290892	1
P46061	Ran GTPase-activating protein 1	13	73	9	60	-0.472668	1
Q9D8B3	Charged multivesicular body protein 4b	10	77	9	60	-0.54963	1
Q62425	NADH dehydrogenase 1 alpha subcomplex subunit 4	5	108	6	61	-1.01388	0.0580979
Q6A028	Switch-associated protein 70	4	31	6	61	0.786807	1
P02466	Collagen alpha-2 chain precursor	7	32	8	61	0.741003	1
P16975	SPARC precursor	7	44	8	61	0.281572	1
P04550	Parathymosin	3	46	4	61	0.217441	1
Q9JIG8	PRA1 family protein 2	4	53	2	61	0.0130827	1
P97629	Leucyl-cystinyl aminopeptidase	9	64	7	61	-0.258997	1
Q8VIJ5	Bifunctional protein NCOAT	9	80	4	61	-0.580925	1
P62634	Cellular nucleic acid-binding protein	7	81	8	61	-0.598847	1
P17220	Proteasome subunit alpha type 2	8	85	8	61	-0.668388	1
Q9EQH3	Vacuolar protein sorting-associated protein 35	21	93	11	61	-0.798156	1
Q9CYN2	Signal peptidase complex subunit 2	11	98	8	61	-0.873707	1
P48450	Lanosterol synthase	7	30	8	62	0.857572	1
Q6AXU6	Hematological and neurological expressed 1 protein	6	40	6	62	0.442534	1
P41498	Low molecular weight phosphotyrosine protein phosphatase	6	42	3	62	0.372145	1
Q63009	Protein arginine N-methyltransferase 1	13	47	11	62	0.209873	1
P19468	Glutamate--cysteine ligase catalytic subunit	14	55	10	62	-0.0168976	1
Q01405	Protein transport protein Sec23A	11	56	11	62	-0.0428928	1
Q9CQD1	Ras-related protein Rab-5A	7	62	4	62	-0.189734	1
P23928	Alpha-crystallin B chain -crystallin)	14	81	9	62	-0.575388	1
P68361	Tubulin alpha-1 chain	22	93	17	62	-0.774697	1
P97855	Ras GTPase-activating protein-binding protein 1	8	96	7	62	-0.8205	1
Q60598	Src substrate cortactin	19	99	11	62	-0.864894	1
P47853	Biglycan precursor	7	25	11	63	1.14369	1
Q64537	Calpain small subunit 1	6	37	8	63	0.578092	1
P55053	Fatty acid-binding protein, epidermal	10	45	6	63	0.295693	1
Q9DBR1	5'-3' exoribonuclease 2	12	48	10	63	0.202583	1
P97310	DNA replication licensing factor MCM2	13	63	13	63	-0.189734	1
Q8BU30	Isoleucyl-tRNA synthetase, cytoplasmic	16	76	10	63	-0.460382	1
Q8C7K6	Prenylcysteine oxidase-like precursor	7	41	4	64	0.452714	1
A1A5P0	Cdc42 effector protein 1	8	63	9	64	-0.167014	1
Q9ET30	Transmembrane 9 superfamily protein member 3 precursor	6	46	9	65	0.309072	1
Q62658	FK506-binding protein 1A	5	50	8	65	0.188777	1
O08782	Aldose reductase-related protein 2	6	51	4	65	0.160208	1
Q6P4Z9	COP9 signalosome complex subunit 8	6	56	5	65	0.0252787	1
Q5PQX1	Torsin-1A-interacting protein 1	8	80	9	65	-0.489294	1
Q9QZD9	Eukaryotic translation initiation factor 3 subunit 2	11	111	8	66	-0.939756	0.157701
Q9Z1A5	NEDD8-activating enzyme E1 regulatory subunit	8	32	8	66	0.85466	1
Q68A21	Transcriptional activator protein Pur-beta	4	33	4	66	0.810266	1
P12007	Isovaleryl-CoA dehydrogenase, mitochondrial precursor	11	52	9	66	0.15422	1
Q61335	B-cell receptor-associated protein 31	7	70	5	66	-0.274623	1
Q66H15	Protein FAM82C	6	80	8	66	-0.467268	1
Q9R0N0	Galactokinase	8	41	6	67	0.518803	1
P52631	Signal transducer and activator of transcription 3	14	62	12	67	-0.0778413	1
Q6AY84	Secernin-1	10	63	13	67	-0.100925	1
P25206	DNA replication licensing factor MCM3	15	87	11	67	-0.566588	1
Q62667	Major vault protein	8	36	12	68	0.727804	1
Q9Z2I9	Succinyl-CoA ligase beta-chain, mitochondrial precursor	5	37	7	68	0.688275	1
Q9JIR4	Regulating synaptic membrane exocytosis protein 1	4	41	3	68	0.540177	1
P34067	Proteasome subunit beta type 4 precursor	9	55	8	68	0.116369	1
Q9QZA2	Programmed cell death 6-interacting protein	14	74	11	68	-0.311725	1
P34926	Microtubule-associated protein 1A	18	50	21	69	0.274934	1
Q6PDQ2	Chromodomain-helicase-DNA-binding protein 4	17	51	16	69	0.246365	1
P61751	ADP-ribosylation factor 4	7	111	7	70	-0.854867	0.656733
P05371	Clusterin precursor	9	29	11	70	1.08157	1
O54861	Sortilin precursor	8	43	7	70	0.513284	1
Q9EPB1	Dipeptidyl-peptidase 2 precursor	8	46	8	70	0.415987	1
Q812D1	PC4 and SFRS1-interacting protein	11	60	10	70	0.0326583	1
Q62785	28 kDa heat- and acid-stable phosphoprotein	8	61	6	70	0.00881152	1
P19139	Casein kinase II subunit alpha	11	78	9	70	-0.345853	1
Q6IFW6	Keratin, type I cytoskeletal 10	8	84	9	70	-0.452769	1
P83941	Transcription elongation factor B polypeptide 1	5	48	2	71	0.37505	1
Q9DAS9	Guanine nucleotide-binding protein G/G/G gamma-12 subunitprecursor	3	60	2	71	0.0531224	1
Q66H80	Coatomer subunit delta	13	67	10	71	-0.106076	1
P21670	Proteasome subunit alpha type 4	9	75	12	71	-0.268806	1
Q6AY20	Cation-dependent mannose-6-phosphate receptor precursor	8	77	9	71	-0.306774	1
P63324	40S ribosomal protein S12	14	109	9	71	-0.808171	1
Q0ZHH6	Atlastin-3	4	60	6	72	0.0733002	1
P63102	14-3-3 protein zeta/delta	5	76	6	72	-0.267737	1
P38062	Methionine aminopeptidase 2	16	99	13	72	-0.649166	1
P11654	Nuclear pore membrane glycoprotein 210 precursor	20	108	14	72	-0.774697	1
Q9CXI5	Protein ARMET precursor	6	31	7	73	1.04589	1
Q9WTM5	RuvB-like 2	11	39	13	73	0.714688	1
P63086	Mitogen-activated protein kinase 1	11	42	9	73	0.607773	1
Q07076	Annexin A7	9	55	7	73	0.218731	1
Q4KLZ6	Dihydroxyacetone kinase	11	56	8	73	0.192735	1
Q9DCT2	NADH dehydrogenase iron-sulfur protein 3, mitochondrialprecursor	4	86	3	73	-0.426174	1
Q9CWK8	Sorting nexin-2	9	41	10	74	0.662167	1
P55770	NHP2-like protein 1	4	49	4	74	0.405009	1
Q05793	Basement membrane-specific heparan sulfate proteoglycan core proteinprecursor	12	52	15	74	0.319279	1
O35509	Ras-related protein Rab-11B	5	63	3	74	0.0424393	1
P29419	ATP synthase e chain, mitochondrial	2	71	1	74	-0.130028	1
P21300	Aldose reductase-related protein 1	6	77	4	74	-0.247067	1
P22509	rRNA 2'-O-methyltransferase fibrillarin	15	87	15	74	-0.423224	1
Q78IK4	Apolipoprotein O-like precursor	3	108	4	74	-0.735168	1
P50503	Hsc70-interacting protein	10	110	6	74	-0.761641	1
Q4QQV3	E2-induced gene 5 protein homolog	4	41	3	75	0.681533	1
P09606	Glutamine synthetase	9	46	13	75	0.515523	1
P24528	Methylated-DNA--protein-cysteine methyltransferase	6	50	5	75	0.395228	1
Q99MN1	Lysyl-tRNA synthetase	7	51	9	75	0.366659	1
Q3USZ8	Uncharacterized protein C3orf58 homolog precursor	8	54	8	75	0.284197	1
P62959	Histidine triad nucleotide-binding protein 1	7	66	6	75	-0.00530959	1
P62775	Myotrophin	9	27	7	76	1.30331	0.155111
Q2TA68	Dynamin-like 120 kDa protein, mitochondrial precursor	10	32	18	76	1.05819	1
Q498C8	Protein RER1	1	33	1	76	1.0138	1
P97891	Translin	8	52	7	76	0.357754	1
Q8CIB5	Pleckstrin homology domain-containing family C member 1	11	72	7	76	-0.111732	1
P20280	60S ribosomal protein L21	4	123	4	77	-0.865462	0.223188
Q9WUM4	Coronin-1C	18	118	7	77	-0.805591	0.913249
Q4QQT4	Serine/threonine-protein phosphatase 2A 65 kDa regulatory subunit Abeta isoform	4	67	7	77	0.0109632	1
P08699	Galectin-3	10	114	8	77	-0.755838	1
P35434	ATP synthase delta chain, mitochondrial precursor	4	49	4	78	0.480958	1
P13668	Stathmin	8	49	8	78	0.480958	1
Q8CEZ4	Uncharacterized protein C2orf54 homolog	1	59	1	78	0.213025	1
Q9Z2W0	Aspartyl aminopeptidase	7	59	6	78	0.213025	1
Q99PV0	Pre-mRNA-processing-splicing factor 8	20	65	16	78	0.0733002	1
P35559	Insulin-degrading enzyme	15	72	11	78	-0.0742569	1
P22734	Catechol O-methyltransferase	11	80	9	78	-0.22626	1
Q6AXV4	Sorting and assembly machinery component 50 homolog	11	103	7	78	-0.590832	1
Q64640	Adenosine kinase	16	53	9	79	0.386126	1
Q6MG60	NG,NG-dimethylarginine dimethylaminohydrolase 2	10	54	9	79	0.359159	1
P29975	Aquaporin-1	4	61	3	79	0.183309	1
P61087	Ubiquitin-conjugating enzyme E2-25 kDa )	13	63	12	79	0.136767	1
P29410	Adenylate kinase isoenzyme 2, mitochondrial	11	84	11	79	-0.278271	1
Q61001	Laminin subunit alpha-5 precursor	15	94	12	79	-0.440542	1
Q5U2X6	Coiled-coil domain-containing protein 47 precursor	14	109	12	79	-0.654138	1
Q9CVB6	Actin-related protein 2/3 complex subunit 2	9	34	9	80	1.04473	1
Q8CHN6	Sphingosine-1-phosphate lyase 1	8	47	5	80	0.577605	1
Q9D0K2	Succinyl-CoA:3-ketoacid-coenzyme A transferase 1, mitochondrialprecursor	13	89	7	80	-0.343539	1
Q64310	Surfeit locus protein 4	5	98	3	80	-0.482516	1
P61805	Dolichyl-diphosphooligosaccharide--protein glycosyltransferase subunitDAD1	3	99	4	80	-0.497163	1
P23514	Coatomer subunit beta	18	75	10	81	-0.0787028	1
O88941	Mannosyl-oligosaccharide glucosidase	9	84	12	81	-0.242202	1
Q9R1Z0	Voltage-dependent anion-selective channel protein 3	6	101	4	81	-0.508096	1
P10688	1-phosphatidylinositol-4,5-bisphosphate phosphodiesterase delta 1	5	36	9	82	0.997893	1
Q00PI9	Heterogeneous nuclear ribonucleoprotein U-like protein 2	10	48	15	82	0.582855	1
O88656	Actin-related protein 2/3 complex subunit 1B	9	51	11	82	0.495393	1
Q9EPL8	Importin-7	13	89	13	82	-0.307916	1
P61290	Proteasome activator complex subunit 3	6	75	8	83	-0.0435134	1
Q9QUR6	Prolyl endopeptidase	14	105	10	83	-0.52894	1
Q6UPR8	Probable peptidase KIAA1815 homolog	11	113	8	83	-0.634874	1
Q9JHJ0	Tropomodulin-3	6	63	7	84	0.225303	1
P47245	Nardilysin precursor	17	75	11	84	-0.0262354	1
P62334	26S protease regulatory subunit S10B	12	84	10	84	-0.189734	1
Q5XIE0	Acidic leucine-rich nuclear phosphoprotein 32 family member E	7	119	5	84	-0.692235	1
P15178	Aspartyl-tRNA synthetase, cytoplasmic	16	98	13	85	-0.395053	1
P70580	Membrane-associated progesterone receptor component 1	10	124	7	85	-0.73454	1
Q6MG08	ATP-binding cassette sub-family F member 1	17	64	13	86	0.236531	1
P17702	60S ribosomal protein L28	10	79	5	86	-0.0672502	1
Q4KMA2	UV excision repair protein RAD23 homolog B	8	79	7	86	-0.0672502	1
Q9D0M3	Cytochrome c1 heme protein, mitochondrial precursor	9	81	8	86	-0.103319	1
P30835	6-phosphofructokinase, liver type	10	82	11	86	-0.121021	1
P23965	3,2-trans-enoyl-CoA isomerase, mitochondrial precursor ,Delta-enoyl-CoA isomerase)	6	38	6	87	1.00528	1
Q01986	Dual specificity mitogen-activated protein kinase kinase 1	10	54	12	87	0.498322	1
Q4FZY0	EF-hand domain-containing protein 2	9	70	9	87	0.123926	1
Q4KM73	UMP-CMP kinase	9	75	9	87	0.0243906	1
P60603	Protein C20orf52 homolog	2	81	2	87	-0.0866407	1
[truncated: 518 more rows]
